# Supplementary material for: Effects of training involving patterned sensory enhancement on improving upper-limb movements in patients with Parkinson’s disease: protocol of a randomised controlled trial
Source: PubMed Central journal article supplement — BMJ Open. 2023 Jul 10;13(7):e072416. doi: 10.1136/bmjopen-2023-072416 (PMC10347490; doi:10.1136/bmjopen-2023-072416), 2023-07-10
Supplement: bmjopen-2023-072416.draft_revisions.pdf [file bmjopen-2023-072416.draft_revisions.pdf]

# BMJ Open

BMJ Open is committed to open peer review. As part of this commitment we make the peer review history of every article we publish publicly available.

When an article is published we post the peer reviewers' comments and the authors' responses online. We also post the versions of the paper that were used during peer review. These are the versions that the peer review comments apply to.

The versions of the paper that follow are the versions that were submitted during the peer review process. They are not the versions of record or the final published versions. They should not be cited or distributed as the published version of this manuscript.

BMJ Open is an open access journal and the full, final, typeset and author-corrected version of record of the manuscript is available on our site with no access controls, subscription charges or pay-per-view fees (<http://bmjopen.bmj.com>).

If you have any questions on BMJ Open's open peer review process please email [info.bmjopen@bmj.com](mailto:info.bmjopen@bmj.com)

# BMJ Open

## A protocol of rhythmic auditory stimulation for improving upper-limb movements in patients with Parkinson's disease

|                               |                                                                                                                                                                                                                                                                                         |
|-------------------------------|-----------------------------------------------------------------------------------------------------------------------------------------------------------------------------------------------------------------------------------------------------------------------------------------|
| Journal:                      | <i>BMJ Open</i>                                                                                                                                                                                                                                                                         |
| Manuscript ID                 | bmjopen-2023-072416                                                                                                                                                                                                                                                                     |
| Article Type:                 | Protocol                                                                                                                                                                                                                                                                                |
| Date Submitted by the Author: | 02-Feb-2023                                                                                                                                                                                                                                                                             |
| Complete List of Authors:     | FAN, Wei; The Hong Kong Polytechnic University, Department of Rehabilitation Sciences<br>Fong, Kenneth N. K.; The Hong Kong Polytechnic University, Department of Rehabilitation Sciences<br>Wang, Shu-Mei; The Hong Kong Polytechnic University, Department of Rehabilitation Sciences |
| Keywords:                     | REHABILITATION MEDICINE, Parkinson-s disease < NEUROLOGY, Clinical trials < THERAPEUTICS                                                                                                                                                                                                |
|                               |                                                                                                                                                                                                                                                                                         |

SCHOLARONE™  
Manuscripts

1  
2  
3  
4  
5  
6  
7  
8  
9  
10  
11  
12  
13  
14  
15  
16  
17  
18  
19  
20  
21  
22  
23  
24  
25  
26  
27  
28  
29  
30  
31  
32  
33  
34  
35  
36  
37  
38  
39  
40  
41  
42  
43  
44  
45  
46  
47  
48  
49  
50  
51  
52  
53  
54  
55  
56  
57  
58  
59  
60

**A protocol of rhythmic auditory stimulation for improving upper-limb movements in patients with Parkinson's disease**

Wei Fan<sup>1</sup>, Kenneth N. K. Fong<sup>1</sup>, Shu-Mei Wang<sup>1</sup>

*<sup>1</sup> Department of Rehabilitation Sciences, The Hong Kong Polytechnic University, Hung Hom, Kowloon, Hong Kong*

Correspondence to: Dr. Shu-Mei Wang; [shumei.wang@polyu.edu.hk](mailto:shumei.wang@polyu.edu.hk)

For peer review only

## ABSTRACT

**Introduction** Bradykinesia (i.e., slow movements) is one of the most prominent symptoms of Parkinson's disease (PD) and has a negative impact on quality of life. Rhythmic auditory stimulation (RAS), a widely used and promising treatment technique, has been shown to effectively improve gait speed in PD patients. However, only few studies have explored effects of training involving RAS on upper-limb movements. The purpose of this study is to investigate effects of movement training involving RAS on upper-limb movement speed and function in PD patients.

**Methods and analysis** Patients with PD will be randomly assigned into two groups: the RAS group and the no-RAS group. A 21-day upper-limb training involving RAS (for the RAS group) or without RAS (for the no-RAS group) will be provided to the patients. An assessor will administer the box and block test (BBT) and the Jebsen hand function test (JHFT) before and after training to assess upper-limb movement speed and function. The independent sample t-test will be performed to compare the BBT and JHFT scores between groups to determine the effects of RAS. This randomized controlled trial will provide evidence supporting the effectiveness of upper-limb movement training involving RAS in reducing the severity of bradykinesia in PD patients.

**Ethics and dissemination** Ethical approval has been obtained from the Institutional Review Board of the Hong Kong Polytechnic University with the reference number HSEARS20221027005. Informed consent forms will be gathered from all patients before their participation. Study results will be disseminated through conferences and peer-reviewed academic journals.

**Trial registration number** ClinicalTrials.gov NCT05637593

**Keywords** Acoustic stimulation, Parkinson's disease, Arm, Movement, Bradykinesia

## ARTICLE SUMMARY

### Strengths and limitations of this study

- This is a randomised controlled trial that provides robust evidence supporting effectiveness of upper-limb movement training involving RAS in PD patients.
- Results of this study form a base of evidence-based therapy in clinical practice for tackling bradykinesia in PD patients.
- Effects of home-based training are susceptible to patient compliance, which has been considered and addressed through daily phone calls and completion of a daily training log.

## INTRODUCTION

Parkinson's disease (PD) is a common neurodegenerative disease caused by neurodegeneration of the substantia nigra, resulting in a decrease in dopamine [1, 2]. The incidence of PD is 14 per 100,000 people per year, and even reaches 160 per 100,000 people over the age of 65 years [3]. Dopamine, a neurotransmitter, is important for the function of the basal ganglia in receiving, modulating, and transmitting signals to various cortical areas, including those associated with movements [4]. Therefore, in PD patients, a decrease in dopamine leads to basal ganglia dysfunction in the cortico-striato-thalamo-cortical circuit, resulting in movement symptoms [5, 6]. Bradykinesia, meaning slowness of movements, is one of the most prominent symptoms of PD [7], extensively interferes with performances of daily activities such as eating, writing, and walking [8], and substantially lowers quality of life in patients [9, 10].

Pharmacotherapy has been shown to alleviate movement symptoms in PD patients. Medications, such as levodopa, are able to adjust activities of the putamen and thalamus, modulate signals from basal ganglia to motor-related cortices, and thus enhance movements in patients [11]. However, long-term use of medications increases medication resistance and thus reduces therapeutic effects, as well as increases side effects of medications such as dyskinesia [12, 13]. Therefore, developing non-pharmacological therapies is warranted and of clinical importance in order to tackle bradykinesia in patients with PD.

Rhythmic auditory stimulation (RAS) is repetitive, discrete sounds with a tempo [14, 15]. Because the tempo of human movements is naturally synchronized with the tempo of RAS [16, 17], RAS has a high potential of being applied to movement training to guide human movement execution [18]. Earlier studies [19] have provided solid evidence that training involving RAS is effective in improving gait performance in PD patients. Earlier classic research [20] examining effects of training involving RAS on gaits in PD patients provided 21-day training with 30 minutes

1  
2  
3 per day, in which RAS with three different tempi (normal RAS, quick RAS, and fast RAS) was  
4 provided. Initially, researchers assessed the baseline walking tempo without the aid of RAS for  
5 each patient. For daily training, each patient was given normal RAS (100% of the baseline  
6 tempo), quick RAS (105% of the baseline tempo), and fast RAS (110% of the baseline tempo) to  
7 guide the gaits. Each RAS was increased by 5% when the time went to next week.  
8  
9  
10  
11  
12

13 Most previous studies that investigated RAS effects in PD patients focused on lower-limb  
14 movements such as gaits [19]. However, upper-limb movements are also important for activities  
15 of daily living and directly affect quality of life in humans [21]. In addition, it is commonly seen  
16 that rehabilitation training for upper-limb movements involves continuous movement repetition,  
17 which supports that RAS may be applicable to upper-limb movement therapy. It is worth  
18 investigating if upper-limb training involving RAS is effective for PD patients. To date, only few  
19 studies [22, 23] have investigated effects of RAS on upper-limb movements in PD patients. A  
20 case report [22] indicated that movement training involving RAS may improve finger tapping  
21 speed and finger dexterity in PD patients. In addition, a study using the repeated measures  
22 design [23] demonstrated that faster RAS immediately induced faster upper-limb movement  
23 speed in PD patients. To date, randomized controlled trials have been needed to determine  
24 whether long-term training involving RAS is effective in improving upper-limb movement speed  
25 and function in PD patients.  
26  
27  
28  
29  
30  
31  
32  
33  
34  
35  
36  
37  
38  
39  
40

41 It has been suggested that training involving RAS establishes an internal sense of rhythms  
42 in humans because humans keep anticipating subsequent beats of RAS [15]. The established  
43 sense of rhythms persists in humans and keeps affecting movement execution even after RAS  
44 disappears [15, 24]. In addition, powerful influences of RAS on movements may also be  
45 associated with plentiful neural connections between auditory and motor cortices, including the  
46 cortico-striato-cortical pathway, the cortico-cerebello-cortical pathway, and auditory-motor neural  
47 connections directly in the cortex [25]. Earlier research [26–29] has reported that RAS not only  
48 activates neurons in the auditory cortex, but also induces neural firing in motor-related cortical  
49  
50  
51  
52  
53  
54  
55  
56  
57

1  
2  
3 regions (such as primary motor cortex, premotor and supplementary motor areas) even though  
4 examinees are stationary without moving. In PD patients, RAS improves movements possibly by  
5 involving the cortico-cerebello-cortical pathway and auditory-motor cortical connections to  
6 modulate neural activity of the motor cortex and bypassing the damaged cortico-striato-cortical  
7 pathway [25, 30]. Additionally, RAS serves as external cues, can provide timing (tempo)  
8 information for PD patients, and thus possibly reduces the dependence of patients' movements  
9 on impaired modulation function of basal ganglia.  
10  
11  
12  
13  
14  
15  
16

17  
18 To sum up, the purpose of this study is to investigate effects of movement training involving  
19 RAS on upper-limb movement speed and function in PD patients. We hypothesize that  
20 movement training involving RAS improves upper-limb movement speed and function in PD  
21 patients. Validation of this hypothesis will fill up the knowledge gap regarding whether RAS is  
22 applicable to upper-limb training in the PD population and provide clinicians with evidence of  
23 non-pharmacological therapy for upper-limb bradykinesia in PD patients. The training program  
24 will serve as a reference for clinical practitioners who are interested in using RAS in clinical  
25 training for PD patients.  
26  
27  
28  
29  
30  
31  
32  
33  
34

## 35 **METHODS AND ANALYSIS**

36  
37  
38  
39 This study follows the SPIRIT (Standard Protocol Items Recommendations for Interventional  
40 Trials) guidelines for reporting [31].  
41  
42  
43

### 44 *Study design*

45  
46  
47 A randomized controlled trial will be used to validate the hypothesis. Patients with PD will be  
48 randomly assigned to two groups by using computer-generated random numbers: the RAS  
49 group and the no-RAS group. Each sealed envelope with an assigned group will be used. The  
50 RAS group will receive upper-limb movement training with the aid of RAS; the no-RAS group will  
51 receive upper-limb movement training without the aid of RAS. This study will provide 21-day  
52  
53  
54  
55  
56  
57



1  
2  
3 training with a session per day and 40 minutes per session. Assessments will be completed  
4 face-to-face before and after the 21-day training by a senior therapist. For all participants,  
5 training and assessments will be performed during the 'on' state of their anti-Parkinson  
6 medication. Daily phone calls and weekly face-to-face meetings with patients will be performed  
7 to increase patient retention. We will monitor muscle fatigue during home training by using a  
8 daily training log in which self-reported reflections will be recorded.  
9  
10  
11  
12  
13  
14

### 15 16 *Patient and public involvement*

17  
18 Patients were involved in the design and dissemination of this research. We carefully  
19 designed the training duration and content to prevent fatigue in patients according to literature  
20 and our pilot study [23]. In addition, we will share key findings of this study with participants at  
21 the end of the study.  
22  
23  
24  
25  
26  
27  
28

### 29 *Participants*

30  
31 Patients with PD will be recruited from hospitals. Age, gender and years of education will be  
32 recorded. Criteria for selecting patients are as follows: (a) idiopathic PD diagnosed by a  
33 neurologist based on the Movement Disorders Society clinical diagnostic criteria [32]; (b) the  
34 Hoehn and Yahr stage is 2 or 3, meaning that bilateral movement problems or combination with  
35 mild postural instability [33]; (c) a score of Montreal Cognitive Assessment is equal to or higher  
36 than 21 to ensure that they understand experimental instructions [34–36]; (d) a score of  
37 Edinburgh Handedness Inventory is above 60 to ensure that they are right-handed [37]; (e)  
38 Types and doses of medications remain unchanged in the past month right before participation.  
39 Exclusion criteria include the presence of medical conditions or diseases that may affect hand  
40 movements, vision, or hearing based on self-report. Patients will sign an informed consent form  
41 prior to admission to this study.  
42  
43  
44  
45  
46  
47  
48  
49  
50  
51  
52  
53  
54  
55  
56  
57  
58  
59  
60

### *Sample size estimation*

Because of no existing PD studies testing effects of training involving RAS on upper-limb movements, we calculated the effect size of training involving RAS ( $d = 0.51$ ) according to data of the classic study [20] examining effects of training involving RAS on gait speed in PD patients. The G\*Power software (version 3.1.9.7) was used. When the effect size  $d$  was 0.51, the power was 0.8, and the  $\alpha$  level (two-tailed) was 0.05, the estimated required sample size was 62 for each group. Considering the dropout rate of 10%, the final sample size was 69 patients per group, for a total of 138 patients.

### *Intervention*

Patients with PD will be randomly assigned into two groups (the RAS group and the no-RAS group). Three-week training will be provided for both groups. The training protocol is mainly based on the classic study [20] examining effects of RAS on gait speed in PD patients and a recent study [38] examining effects of RAS on upper-limb movements in the population exhibiting movement slowness. We increase frequency of breaks during training per day because our pilot study [23] observed that patients with PD had muscle fatigue easily when following RAS to execute upper-limb movements without frequent breaks. The training task of this study will be to use the right hand to move wooden beads one by one from one target bowl to the main bowl on the table (Figure 1A). Three target bowls, labeled as the left, middle, and right target bowl, will be placed on the table at an equal distance from the main bowl. The distance between a target bowl and the main bowl will be set at 30 cm, which is 50% of the upper-limb length (from the shoulder to the middle finger tip) of Hong Kong women [39], to ensure that beads in the target bowls are reachable for research participants. The angle between adjacent target bowls relative to the main bowl will be 30 degrees. Wooden beads with a diameter of 2 cm will be put in target bowls. The main bowl will be placed in front of the patient.

1  
2  
3 Patients will be asked to use the right hand to take one bead at a time from the left target bowl to  
4 the main bowl, repeat this movement for the middle and right target bowls, and keep repeating  
5 this order (Figure 1B).  
6  
7  
8

9 Each daily training will consist of three rounds separated by two 5-minute breaks. Each  
10 round (about 10 minutes) will consist of four 2-minute training sessions with a 30-second break  
11 between two adjacent sessions. On the first day after the pretest, patients will receive the first  
12 training session face-to-face in a hospital. After the first training session, patients will carry all  
13 training materials back home for subsequent 6-day home training sessions. Family members or  
14 caregivers will be only permitted to assist in setting up the training environment and not allowed  
15 to assist the patient during training. On the first day of each subsequent training week, patients  
16 will be asked to return to the hospital to receive a face-to-face training session. Research  
17 personnel will make phone calls every day to remind patients to complete daily training. In  
18 addition, patients will be required to complete a daily training log to ensure compliance.  
19  
20  
21  
22  
23  
24  
25  
26  
27  
28  
29

30 Before the first-day training, the baseline tempo of executing the training task will be  
31 assessed for each patient. The patient will be required to perform the aforementioned upper-limb  
32 movement task as fast as possible within 30 seconds without listening to RAS. The obtained  
33 number of wooden beads in the main bowl multiplied by two will be the baseline tempo (unit:  
34 beat per minute) for each patient [15, 20].  
35  
36  
37  
38  
39  
40

41 For the RAS group, each patient will receive a 45-minute audio file, which includes briefing  
42 the patient about the daily training content (five minutes) and providing RAS (10 minutes per  
43 round multiplied by three rounds, plus two 5-minute break time; a total of 40 minutes). The  
44 normal RAS (100% of the baseline tempo), the quick RAS (105% of the baseline tempo), and  
45 the fast RAS (110% of the baseline tempo) will be provided in the first, second, and third round  
46 of training (Table 1). The patient will be asked to pick up a bead when s/he hears a beep sound  
47 of RAS. The tempo of the three RAS will be further increased by 5% of the baseline tempo when  
48 it goes to a new week. In the face-to-face session (the first day) of each week, the patient will  
49  
50  
51  
52  
53  
54  
55  
56  
57

obtain a new audio file and complete daily training face-to-face in hospital. RAS will be metronome beep sounds generated by a metronome (SQ200, Seiko incorporated). The required tempo of RAS will be adjusted using the computer software Adobe Audition CC 2020. The audio file will be sent to the patient's mobile phone, which will then be used to play the audio file during both face-to-face and home training.

**Table 1.** RAS tempi that are provided in daily upper-limb training

| Day                                 | Normal RAS in round 1         | Quick RAS in round 2          | Fast RAS in round 3           |
|-------------------------------------|-------------------------------|-------------------------------|-------------------------------|
| 1 <sup>st</sup> – 7 <sup>th</sup>   | 100% of the baseline<br>tempo | 105% of the baseline<br>tempo | 110% of the baseline<br>tempo |
| 8 <sup>th</sup> – 14 <sup>th</sup>  | 105% of the baseline<br>tempo | 110% of the baseline<br>tempo | 115% of the baseline<br>tempo |
| 15 <sup>th</sup> – 21 <sup>st</sup> | 110% of the baseline<br>tempo | 115% of the baseline<br>tempo | 120% of the baseline<br>tempo |

RAS, rhythmic auditory stimulation.

The no-RAS group will receive a 45-minute audio file, which briefs the patient about the daily training content (five minutes) and instructs the patient to move beads as fast as possible in each round without RAS. The training protocol is the same in the RAS group and the no-RAS group except no RAS is provided for the no-RAS group during training. Similarly, the no-RAS group will perform the training face-to-face on the first day of each week in the hospital and at home on the remaining six days of a week.

### *Outcome measures*

The box and block test (BBT) is used to measure gross manual dexterity as well as upper-limb movement speed [40]. It is a 53.7\* 25.4 cm box separated into two compartments by a 15.2 cm high erected partition, with 150 blocks in each compartment. Starting from the dominant hand, patients will be asked to move the blocks one by one from the compartment on the hand side to the opposite side (e.g., move the blocks from the right compartment to the left compartment for the right hand test). Patients should move the blocks with their arms raised and crossed over the partition. They have one minute to move the blocks as fast as possible. The score of BBT for each hand is the quantity of blocks transferred between compartments in one minute. A higher score indicates faster upper-limb movements and better dexterity. For the elderly, the BBT has high test-retest reliability (intraclass correlation coefficient of 0.89 to 0.97) and construct validity [41].

The Jebsen hand function test (JHFT) is used to assess unimanual hand function when examinees perform daily activities. Seven items are included in JHFT: writing, turning cards, picking up small objects, simulated feeding, stacking checkers, moving large light objects, and moving large heavy objects [42]. Considering that the patients are Chinese speakers, it is not appropriate to do English writing. According to a previous study conducted in Chinese cultures [43], the JHFT could be modified through excluding the writing item to avoid cultural influences on scores. The score for each item is the completion time. The less time a patient takes, the better hand function s/he has. The JHFT has excellent test-retest reliability (intraclass correlation coefficients of 0.89 to 0.97) for PD patients [44].

### *Safety*

To assess the data safety, scientific validity, and integrity of clinical trials, a data monitoring committee will be formed by two senior researchers who are not involved in the group allocation

1  
2  
3 and protocol implications. After the study is completed, the research data will be retained in  
4 demographic and scoring sheets will be retained for five years and destroyed afterwards. In this  
5 study, adverse events, defined as any unfavorable medical occurrence in a patient, will be  
6 collected and reported to data monitoring committee for records. This study will provide  
7 movement training. If participants have muscle fatigue during training, research personnel will  
8 provide break time immediately.  
9  
10  
11  
12  
13  
14  
15

### 16 *Data collection and statistical analysis*

17  
18  
19  
20 The general information and results will be kept on a portable hard drive. Authors of this  
21 study will conduct interim analysis to re-estimate the required sample size and determine if the  
22 study should continue or be modified. Only authors of this study will be allowed to get access to  
23 the dataset.  
24  
25  
26  
27

28 To test the baseline difference, the independent sample t-test (for continuous variables) and  
29 the chi-square test (for categorical variables) will be used to examine if age, gender, years of  
30 education, Montreal Cognitive Assessment scores, Hoehn and Yahr stages, and pretest scores  
31 of BBT and JHFT are the same between the RAS group and the no-RAS group. The  
32 independent sample t-test will be performed to compare the difference in posttest scores of BBT  
33 and JHFT between groups. The alpha level (two-tailed) will be set at 0.05. It is hypothesized that  
34 (a) posttest scores of BBT are higher in the RAS group than the no-RAS group, and (b) posttest  
35 scores of JHFT are higher in the RAS group than the no-RAS group. Patients may drop out  
36 before the study is completed. The last data point of the patient will be used to handle the  
37 missing data. The SPSS package (the 25th version) will be used to conduct statistical analysis.  
38  
39  
40  
41  
42  
43  
44  
45  
46  
47  
48  
49

## 50 **DISCUSSION**

51  
52  
53 RAS, a common technique of neuromusic therapy, has been used extensively to improve  
54 gait, stride length, and balance in PD patients [19]. Earlier research has provided explanations of  
55  
56  
57

1  
2  
3 mechanisms of RAS effects in the PD population [25]. Major explanations are that RAS may  
4 activate alternative and intact neural pathways or may provide timing information from the beat  
5 of RAS so as to improve movement control and alleviate bradykinesia in PD patients [25].  
6  
7 Bradykinesia is also present in upper limbs, in addition to lower limbs, in PD patients and affects  
8 daily activities and quality of life in patients [9, 10]. Even though RAS is a promising training  
9 technique for bradykinesia, how to apply RAS to upper-limb movement training for PD patients is  
10 still unclear. To our best knowledge, scarce training protocols targeting upper-limb movement  
11 training involving RAS for the PD population have been available in research. This study  
12 presented a pioneering training protocol, which could be used in future randomized controlled  
13 trials to validate effects of training involving RAS on improving upper-limb movements in PD  
14 patients. The training program shown in this study will serve as a reference for researchers and  
15 clinicians who are interested in developing intervention for tackling upper-limb bradykinesia in  
16 PD patients.  
17  
18  
19  
20  
21  
22  
23  
24  
25  
26  
27  
28  
29

30 It is fundamental for training involving RAS to determine a baseline tempo of executing an  
31 upper-limb or lower-limb movement (without the aid of RAS), which is used to calculate the  
32 speed of normal, quick, and fast RAS in the training. In previous studies regarding walking in PD  
33 patients, the baseline tempo was the tempo when the participant walked at a general and  
34 comfortable pace, not at the fastest pace [20, 45]. In other words, the baseline tempo of walking  
35 in earlier research was a performance patients chose to make, not the best performance  
36 patients could make. Therefore, the speed of quick and fast RAS provided in training in earlier  
37 research may not be faster than the baseline best walking ability/speed when patients had not  
38 received training involving RAS. By contrast, the current study protocol was designed to detect a  
39 baseline tempo at participants' fastest pace and thus able to provide participants with quick and  
40 fast RAS with speed faster than their baseline best movement abilities. This design may  
41 contribute to optimizing effects of RAS incorporated in movement training.  
42  
43  
44  
45  
46  
47  
48  
49  
50  
51  
52  
53  
54  
55  
56  
57  
58  
59  
60

1  
2  
3 Our previous empirical study has reported immediate effects of RAS on inducing faster  
4 upper-limb movements in PD patients [23]. However, we observed that although RAS with  
5 speed of 110% and 120% of baseline tempos was effective, patients had muscle fatigue easily  
6 to follow the beat of RAS on a movement task. Considering this study protocol provided daily  
7 movement training lasting for 40 minutes, it adopted quick and fast RAS with speed of 105% and  
8 110% of baseline tempos as well as increased the frequency of break during training to reduce  
9 muscle fatigue in patients.  
10  
11  
12  
13  
14  
15  
16  
17

18 To sum up, this study protocol will support healthcare providers in academia and clinical  
19 settings to provide promising non-pharmacological therapy, that is, training involving RAS, for  
20 tackling upper-limb bradykinesia in PD patients.  
21  
22  
23  
24  
25  
26  
27  
28  
29  
30  
31  
32  
33  
34  
35  
36  
37  
38  
39  
40  
41  
42  
43  
44  
45  
46  
47  
48  
49  
50  
51  
52  
53  
54  
55  
56  
57  
58  
59  
60



## Contributors

Wei Fan: Study conception and design. Execution. Writing of the first draft.

Kenneth N. K. Fong: Review and critique.

Shu-Mei Wang: Study conception and design. Review and critique.

## Funding

This research did not receive any specific grant from funding agencies in the public, commercial, or not-for-profit sectors.

## Competing interests:

None declared.

## Ethics and dissemination:

Ethical approval has been obtained from the Institutional Review Board of the Hong Kong Polytechnic University with the reference number HSEARS20221027005. It has been registered on ClinicalTrials.gov under the identifier NCT05637593.

Patients who are eligible will be well-informed about the objectives and timeline of this study. Informed consent forms will be gathered from all patients before their participation. The general health condition of patients will be monitored via daily phone calls and weekly face-to-face meetings. Training will be suspended or terminated when there are adverse events. Study results will be disseminated through conferences and peer-reviewed academic journals. Identifiable information of patients will not be disclosed during result dissemination.

**REFERENCES**

- 1 Jastrzębowska MA, Marquis R, Melie-García L, et al. Dopaminergic modulation of motor network compensatory mechanisms in Parkinson's disease. *Hum Brain Map* 2019;40(15):4397–416.
- 2 Gale JT, Amirnovin R, Williams ZM, et al. From symphony to cacophony: pathophysiology of the human basal ganglia in Parkinson disease. *Neurosci Biobehav Rev* 2008;32(3):378–87.
- 3 Ascherio A, Schwarzschild MA. The epidemiology of Parkinson's disease: risk factors and prevention. *The Lancet Neurology* 2016;15(12):1257–72.
- 4 Haber SN, Adler A, Bergman H. The Basal Ganglia. In: *The Human Nervous System*: Elsevier 2012:678–738.
- 5 Sian J, Gerlach M, Youdim MB, et al. Parkinson's disease: a major hypokinetic basal ganglia disorder. *J Neural Transm (Vienna)* 1999;106(5-6):443–76.
- 6 Redgrave P, Rodriguez M, Smith Y, et al. Goal-directed and habitual control in the basal ganglia: implications for Parkinson's disease. *Nat Rev Neurosci* 2010;11(11):760–72.
- 7 Radhakrishnan DM, Goyal V. Parkinson's disease: A review. *Neurol India* 2018;66(Supplement):S26-S35.
- 8 Simões R, Litvan I. Bradykinesia. In: *Encyclopedia of Movement Disorders*: Elsevier 2010:158–61.
- 9 Muslimovic D, Post B, Speelman JD, et al. Determinants of disability and quality of life in mild to moderate Parkinson disease. *Neurology* 2008;70(23):2241–47.
- 10 Rajiah K, Maharajan MK, Yeen SJ, et al. Quality of life and caregivers' burden of Parkinson's disease. *Neuroepidemiology* 2017;48(3-4):131–37.
- 11 Kraft E, Loichinger W, Diepers M, et al. Levodopa-induced striatal activation in Parkinson's disease: a functional MRI study. *Parkinsonism Relat Disord* 2009;15(8):558–63.

- 12 Nonnekes J, Timmer MHM, Vries NM de, et al. Unmasking levodopa resistance in Parkinson's disease. *Mov Disord* 2016;31(11):1602–09.
- 13 Vorovenci RJ, Biundo R, Antonini A. Therapy-resistant symptoms in Parkinson's disease. *J Neural Transm (Vienna)* 2016;123(1):19–30.
- 14 Ni M, Hazzard JB, Signorile JF, et al. Exercise guidelines for gait function in Parkinson's disease: a systematic review and meta-analysis. *Neurorehabil Neural Repair* 2018;32(10):872–86.
- 15 Nombela C, Hughes LE, Owen AM, et al. Into the groove: can rhythm influence Parkinson's disease? *Neurosci Biobehav Rev* 2013;37(10 Pt 2):2564–70.
- 16 Thaut MH, Abiru M. Rhythmic auditory stimulation in rehabilitation of movement disorders: a review of current research. *Music Perception* 2010;27(4):263–69.
- 17 Schaffert N, Janzen TB, Mattes K, et al. A review on the relationship between sound and movement in sports and rehabilitation. *Front Psychol* 2019;10(244):244.
- 18 Thaut MH, McIntosh GC, Hoemberg V. Neurobiological foundations of neurologic music therapy: rhythmic entrainment and the motor system. *Front Psychol* 2014;5:1185.
- 19 Ghai S, Ghai I, Schmitz G, et al. Effect of rhythmic auditory cueing on parkinsonian gait: A systematic review and meta-analysis. *Sci Rep* 2018;8(1):506.
- 20 Thaut MH, McIntosh GC, Rice RR, et al. Rhythmic auditory stimulation in gait training for Parkinson's disease patients. *Mov Disord* 1996;11(2):193–200.
- 21 Cahn DA, Sullivan EV, Shear PK, et al. Differential contributions of cognitive and motor component processes to physical and instrumental activities of daily living in Parkinson's disease. *Arch Clin Neuropsychol* 1998;13(7):575–83.
- 22 Buard I, Dewispelaere WB, Thaut M, et al. Preliminary neurophysiological evidence of altered cortical activity and connectivity with neurologic music therapy in Parkinson's disease. *Front Neurosci* 2019;13:105.

- 1  
2  
3 23 Fan W, Li J, Wei W, et al. Effects of rhythmic auditory stimulation on upper-limb movements  
4 in patients with Parkinson's disease. *Parkinsonism Relat Disord* 2022;101:27–30.  
5  
6  
7 24 Palmer C, Krumhansl CL. Mental representations for musical meter. *Journal of*  
8  
9 *Experimental Psychology: Human Perception and Performance* 1990;16(4):728–41.  
10  
11 25 Leuk JSP, Low LLN, Teo W-P. An overview of acoustic-based interventions to improve  
12 motor symptoms in Parkinson's disease. *Front Aging Neurosci* 2020;12:243.  
13  
14  
15 26 Chen JL, Penhune VB, Zatorre RJ. Listening to musical rhythms recruits motor regions of  
16 the brain. *Cereb Cortex* 2008;18(12):2844–54.  
17  
18  
19 27 Bengtsson SL, Ullén F, Ehrsson HH, et al. Listening to rhythms activates motor and  
20 premotor cortices. *Cortex* 2009;45(1):62–71.  
21  
22  
23 28 Koshimori Y, Thaut MH. Future perspectives on neural mechanisms underlying rhythm and  
24 music based neurorehabilitation in Parkinson's disease. *Ageing Res Rev* 2018;47:133–39.  
25  
26  
27 29 Grahn JA, Rowe JB. Feeling the beat: premotor and striatal interactions in musicians and  
28 nonmusicians during beat perception. *J Neurosci* 2009;29(23):7540–48.  
29  
30  
31 30 Braunlich K, Seger CA, Jentink KG, et al. Rhythmic auditory cues shape neural network  
32 recruitment in Parkinson's disease during repetitive motor behavior. *Eur J Neurosci*  
33 2019;49(6):849–58.  
34  
35  
36 31 Chan A-W, Tetzlaff JM, Gøtzsche PC, et al. SPIRIT 2013 explanation and elaboration:  
37 guidance for protocols of clinical trials. *BMJ* 2013;346:e7586.  
38  
39  
40 32 Postuma RB, Berg D, Stern M, et al. MDS clinical diagnostic criteria for Parkinson's  
41 disease. *Mov Disord* 2015;30(12):1591–601.  
42  
43  
44 33 Goetz CG, Tilley BC, Shaftman SR, et al. Movement Disorder Society-sponsored revision of  
45 the Unified Parkinson's Disease Rating Scale (MDS-UPDRS): scale presentation and  
46 clinimetric testing results. *Mov Disord* 2008;23(15):2129–70.  
47  
48  
49 34 Dalrymple-Alford JC, MacAskill MR, Nakas CT, et al. The MoCA: well-suited screen for  
50 cognitive impairment in Parkinson disease. *Neurology* 2010;75(19):1717–25.  
51  
52  
53  
54  
55  
56  
57  
58  
59  
60

- 1  
2  
3 35 Wang YP, Xu GL, Yang SQ, Liu XM, Deng XY. Value of Montreal Cognitive Assessment in  
4 identifying patients with mild vascular cognitive impairment after first stroke. *Chinese*  
5 *Journal of Neuromedicine* 2010;9(5):503–07.  
6  
7  
8  
9 36 Vitorio R, Stuart S, Gobbi LTB, et al. Reduced gait variability and enhanced brain activity in  
10 older adults with auditory cues: a functional near-infrared spectroscopy study. *Neurorehabil*  
11 *Neural Repair* 2018;32(11):976–87.  
12  
13  
14  
15 37 Yang N, Waddington G, Adams R, et al. Translation, cultural adaptation, and test-retest  
16 reliability of Chinese versions of the Edinburgh Handedness Inventory and Waterloo  
17 Footedness Questionnaire. *Laterality* 2018;23(3):255–73.  
18  
19  
20  
21 38 Wang S-M, Chan S-T, Wong Y-L, et al. Rhythmic auditory stimulation incorporated in  
22 training improved movements in individuals with psychotic-like experiences. *Eur Arch*  
23 *Psychiatry Clin Neurosci* 2022.  
24  
25  
26  
27 39 Alan H.S. Chan. Upper limb length n.d. Available at:  
28 <http://personal.cityu.edu.hk/meachan/Online%20Anthropometry/Chapter2/Ch2-24.htm>  
29  
30  
31  
32 Accessed August 21, 2022.  
33  
34  
35 40 Mathiowetz V, Volland G, Kashman N, et al. Adult norms for the Box and Block Test of  
36 manual dexterity. *Am J Occup Ther* 1985;39(6):386–91.  
37  
38  
39 41 Desrosiers J, Bravo G, Hébert R, et al. Validation of the Box and Block Test as a measure  
40 of dexterity of elderly people: reliability, validity, and norms studies. *Arch Phys Med Rehabil*  
41 1994;75(7):751–55.  
42  
43  
44  
45 42 Jebsen RH, Taylor N, Trieschmann RB, et al. An objective and standardized test of hand  
46 function. *Arch Phys Med Rehabil* 1969;50(6):311–19.  
47  
48  
49 43 Dong VA, Fong KNK, Chen Y-F, et al. 'Remind-to-move' treatment versus constraint-  
50 induced movement therapy for children with hemiplegic cerebral palsy: a randomized  
51 controlled trial. *Dev Med Child Neurol* 2017;59(2):160–67.  
52  
53  
54  
55  
56  
57  
58  
59  
60

- 1  
2  
3 44 Mak MKY, Lau ETL, Tam VWK, et al. Use of Jebsen Taylor Hand Function Test in  
4  
5 evaluating the hand dexterity in people with Parkinson's disease. *J Hand Ther*  
6  
7 2015;28(4):389-94; quiz 395.  
8  
9 45 Calabrò RS, Naro A, Filoni S, et al. Walking to your right music: a randomized controlled  
10  
11 trial on the novel use of treadmill plus music in Parkinson's disease. *J Neuroeng Rehabil*  
12  
13 2019;16(1):68.  
14  
15  
16  
17  
18  
19  
20  
21  
22  
23  
24  
25  
26  
27  
28  
29  
30  
31  
32  
33  
34  
35  
36  
37  
38  
39  
40  
41  
42  
43  
44  
45  
46  
47  
48  
49  
50  
51  
52  
53  
54  
55  
56  
57  
58  
59  
60

For peer review only

1  
2  
3 **Figure captions**  
4

5 **Figure 1.** (A) The setup of the upper-limb training task. (B) The patient picks up one bead from  
6  
7 one target bowl and is going to move the bead to the main bowl.  
8  
9  
10  
11  
12  
13  
14  
15  
16  
17  
18  
19  
20  
21  
22  
23  
24  
25  
26  
27  
28  
29  
30  
31  
32  
33  
34  
35  
36  
37  
38  
39  
40  
41  
42  
43  
44  
45  
46  
47  
48  
49  
50  
51  
52  
53  
54  
55  
56  
57  
58  
59  
60

For peer review only

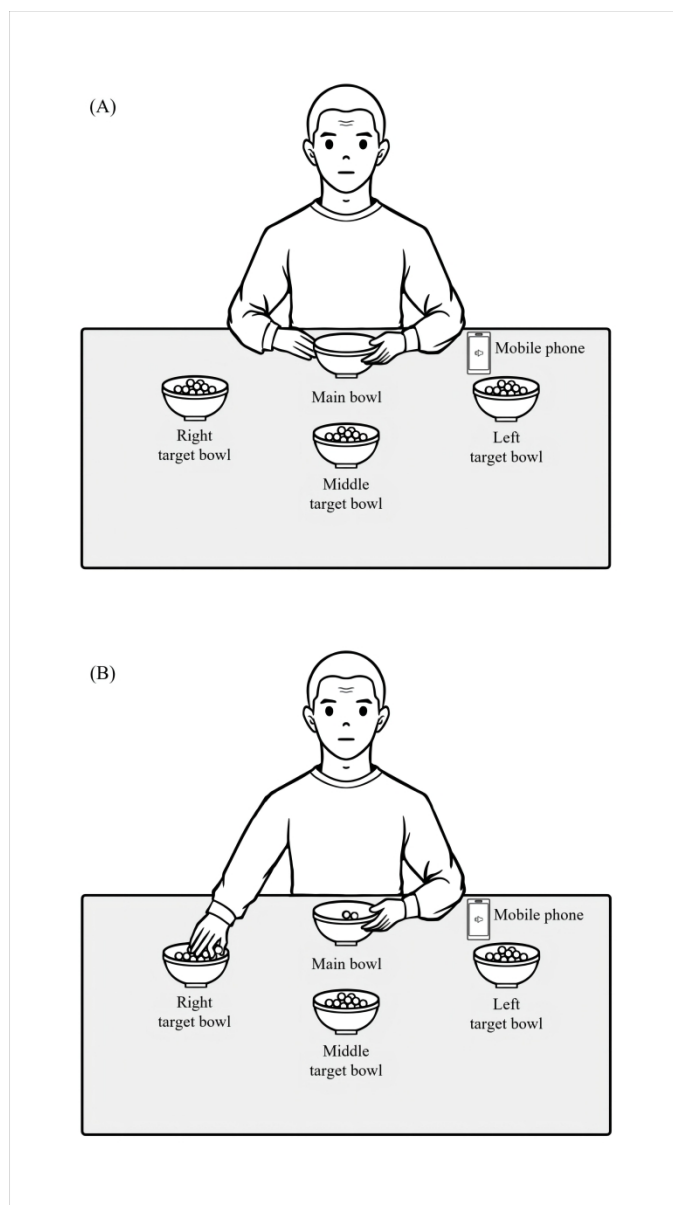

Figure 1

530x940mm (216 x 216 DPI)



# Reporting checklist for protocol of a clinical trial.

Based on the SPIRIT guidelines.

## Instructions to authors

Complete this checklist by entering the page numbers from your manuscript where readers will find each of the items listed below.

Your article may not currently address all the items on the checklist. Please modify your text to include the missing information. If you are certain that an item does not apply, please write "n/a" and provide a short explanation.

Upload your completed checklist as an extra file when you submit to a journal.

In your methods section, say that you used the SPIRIT reporting guidelines, and cite them as:

Chan A-W, Tetzlaff JM, Gøtzsche PC, Altman DG, Mann H, Berlin J, Dickersin K, Hróbjartsson A, Schulz KF, Parulekar WR, Krleža-Jerić K, Laupacis A, Moher D. SPIRIT 2013 Explanation and Elaboration: Guidance for protocols of clinical trials. *BMJ*. 2013;346:e7586

|                                             |                     | Reporting Item                                                                                               | Page Number |
|---------------------------------------------|---------------------|--------------------------------------------------------------------------------------------------------------|-------------|
| <b>Administrative information</b>           |                     |                                                                                                              |             |
| Title                                       | <a href="#">#1</a>  | Descriptive title identifying the study design, population, interventions, and, if applicable, trial acronym | 1           |
| Trial registration                          | <a href="#">#2a</a> | Trial identifier and registry name. If not yet registered, name of intended registry                         | 2           |
| Trial registration: data set                | <a href="#">#2b</a> | All items from the World Health Organization Trial Registration Data Set                                     | 2           |
| Protocol version                            | <a href="#">#3</a>  | Date and version identifier                                                                                  | n/a         |
| Funding                                     | <a href="#">#4</a>  | Sources and types of financial, material, and other support                                                  | 15          |
| Roles and responsibilities: contributorship | <a href="#">#5a</a> | Names, affiliations, and roles of protocol contributors                                                      | 15          |

|    |                           |                     |                                                                      |       |
|----|---------------------------|---------------------|----------------------------------------------------------------------|-------|
| 1  | Roles and                 | <a href="#">#5b</a> | Name and contact information for the trial sponsor                   | 1     |
| 2  | responsibilities:         |                     |                                                                      |       |
| 3  | sponsor contact           |                     |                                                                      |       |
| 4  | information               |                     |                                                                      |       |
| 5  |                           |                     |                                                                      |       |
| 6  |                           |                     |                                                                      |       |
| 7  |                           |                     |                                                                      |       |
| 8  | Roles and                 | <a href="#">#5c</a> | Role of study sponsor and funders, if any, in study design;          | 15    |
| 9  | responsibilities:         |                     | collection, management, analysis, and interpretation of data;        |       |
| 10 | sponsor and funder        |                     | writing of the report; and the decision to submit the report for     |       |
| 11 |                           |                     | publication, including whether they will have ultimate authority     |       |
| 12 |                           |                     | over any of these activities                                         |       |
| 13 |                           |                     |                                                                      |       |
| 14 |                           |                     |                                                                      |       |
| 15 |                           |                     |                                                                      |       |
| 16 | Roles and                 | <a href="#">#5d</a> | Composition, roles, and responsibilities of the coordinating centre, | 11-12 |
| 17 | responsibilities:         |                     | steering committee, endpoint adjudication committee, data            |       |
| 18 | committees                |                     | management team, and other individuals or groups overseeing the      |       |
| 19 |                           |                     | trial, if applicable (see Item 21a for data monitoring committee)    |       |
| 20 |                           |                     |                                                                      |       |
| 21 |                           |                     |                                                                      |       |
| 22 |                           |                     |                                                                      |       |
| 23 | <b>Introduction</b>       |                     |                                                                      |       |
| 24 |                           |                     |                                                                      |       |
| 25 | Background and            | <a href="#">#6a</a> | Description of research question and justification for undertaking   | 4-6   |
| 26 | rationale                 |                     | the trial, including summary of relevant studies (published and      |       |
| 27 |                           |                     | unpublished) examining benefits and harms for each intervention      |       |
| 28 |                           |                     |                                                                      |       |
| 29 |                           |                     |                                                                      |       |
| 30 | Background and            | <a href="#">#6b</a> | Explanation for choice of comparators                                | 4-6   |
| 31 | rationale: choice of      |                     |                                                                      |       |
| 32 | comparators               |                     |                                                                      |       |
| 33 |                           |                     |                                                                      |       |
| 34 |                           |                     |                                                                      |       |
| 35 |                           |                     |                                                                      |       |
| 36 | Objectives                | <a href="#">#7</a>  | Specific objectives or hypotheses                                    | 6     |
| 37 |                           |                     |                                                                      |       |
| 38 | Trial design              | <a href="#">#8</a>  | Description of trial design including type of trial (eg, parallel    | 6-7   |
| 39 |                           |                     | group, crossover, factorial, single group), allocation ratio, and    |       |
| 40 |                           |                     | framework (eg, superiority, equivalence, non-inferiority,            |       |
| 41 |                           |                     | exploratory)                                                         |       |
| 42 |                           |                     |                                                                      |       |
| 43 |                           |                     |                                                                      |       |
| 44 |                           |                     |                                                                      |       |
| 45 | <b>Methods:</b>           |                     |                                                                      |       |
| 46 | <b>Participants,</b>      |                     |                                                                      |       |
| 47 | <b>interventions, and</b> |                     |                                                                      |       |
| 48 | <b>outcomes</b>           |                     |                                                                      |       |
| 49 |                           |                     |                                                                      |       |
| 50 |                           |                     |                                                                      |       |
| 51 |                           |                     |                                                                      |       |
| 52 | Study setting             | <a href="#">#9</a>  | Description of study settings (eg, community clinic, academic        | 6-7   |
| 53 |                           |                     | hospital) and list of countries where data will be collected.        |       |
| 54 |                           |                     | Reference to where list of study sites can be obtained               |       |
| 55 |                           |                     |                                                                      |       |
| 56 |                           |                     |                                                                      |       |
| 57 | Eligibility criteria      | <a href="#">#10</a> | Inclusion and exclusion criteria for participants. If applicable,    | 7     |
| 58 |                           |                     | eligibility criteria for study centres and individuals who will      |       |
| 59 |                           |                     |                                                                      |       |
| 60 |                           |                     |                                                                      |       |

perform the interventions (eg, surgeons, psychotherapists)

|    |                              |                      |                                                                       |
|----|------------------------------|----------------------|-----------------------------------------------------------------------|
| 1  |                              |                      |                                                                       |
| 2  |                              |                      |                                                                       |
| 3  | Interventions:               | <a href="#">#11a</a> | Interventions for each group with sufficient detail to allow          |
| 4  | description                  |                      | replication, including how and when they will be administered         |
| 5  |                              |                      |                                                                       |
| 6  | Interventions:               | <a href="#">#11b</a> | Criteria for discontinuing or modifying allocated interventions for a |
| 7  | modifications                |                      | given trial participant (eg, drug dose change in response to harms,   |
| 8  |                              |                      | participant request, or improving / worsening disease)                |
| 9  |                              |                      |                                                                       |
| 10 |                              |                      |                                                                       |
| 11 | Interventions:               | <a href="#">#11c</a> | Strategies to improve adherence to intervention protocols, and any    |
| 12 | adherence                    |                      | procedures for monitoring adherence (eg, drug tablet return;          |
| 13 |                              |                      | laboratory tests)                                                     |
| 14 |                              |                      |                                                                       |
| 15 |                              |                      |                                                                       |
| 16 |                              |                      |                                                                       |
| 17 | Interventions:               | <a href="#">#11d</a> | Relevant concomitant care and interventions that are permitted or     |
| 18 | concomitant care             |                      | prohibited during the trial                                           |
| 19 |                              |                      |                                                                       |
| 20 |                              |                      |                                                                       |
| 21 | Outcomes                     | <a href="#">#12</a>  | Primary, secondary, and other outcomes, including the specific        |
| 22 |                              |                      | measurement variable (eg, systolic blood pressure), analysis metric   |
| 23 |                              |                      | (eg, change from baseline, final value, time to event), method of     |
| 24 |                              |                      | aggregation (eg, median, proportion), and time point for each         |
| 25 |                              |                      | outcome. Explanation of the clinical relevance of chosen efficacy     |
| 26 |                              |                      | and harm outcomes is strongly recommended                             |
| 27 |                              |                      |                                                                       |
| 28 |                              |                      |                                                                       |
| 29 |                              |                      |                                                                       |
| 30 |                              |                      |                                                                       |
| 31 | Participant timeline         | <a href="#">#13</a>  | Time schedule of enrolment, interventions (including any run-ins      |
| 32 |                              |                      | and washouts), assessments, and visits for participants. A            |
| 33 |                              |                      | schematic diagram is highly recommended (see Figure)                  |
| 34 |                              |                      |                                                                       |
| 35 |                              |                      |                                                                       |
| 36 | Sample size                  | <a href="#">#14</a>  | Estimated number of participants needed to achieve study              |
| 37 |                              |                      | objectives and how it was determined, including clinical and          |
| 38 |                              |                      | statistical assumptions supporting any sample size calculations       |
| 39 |                              |                      |                                                                       |
| 40 |                              |                      |                                                                       |
| 41 | Recruitment                  | <a href="#">#15</a>  | Strategies for achieving adequate participant enrolment to reach      |
| 42 |                              |                      | target sample size                                                    |
| 43 |                              |                      |                                                                       |
| 44 |                              |                      |                                                                       |
| 45 | <b>Methods: Assignment</b>   |                      |                                                                       |
| 46 | <b>of interventions (for</b> |                      |                                                                       |
| 47 | <b>controlled trials)</b>    |                      |                                                                       |
| 48 |                              |                      |                                                                       |
| 49 |                              |                      |                                                                       |
| 50 | Allocation: sequence         | <a href="#">#16a</a> | Method of generating the allocation sequence (eg, computer-           |
| 51 | generation                   |                      | generated random numbers), and list of any factors for                |
| 52 |                              |                      | stratification. To reduce predictability of a random sequence,        |
| 53 |                              |                      | details of any planned restriction (eg, blocking) should be provided  |
| 54 |                              |                      | in a separate document that is unavailable to those who enrol         |
| 55 |                              |                      | participants or assign interventions                                  |
| 56 |                              |                      |                                                                       |
| 57 |                              |                      |                                                                       |
| 58 |                              |                      |                                                                       |
| 59 |                              |                      |                                                                       |
| 60 |                              |                      |                                                                       |

|    |                        |                      |                                                                       |       |
|----|------------------------|----------------------|-----------------------------------------------------------------------|-------|
| 1  | Allocation concealment | <a href="#">#16b</a> | Mechanism of implementing the allocation sequence (eg, central        | 6     |
| 2  | mechanism              |                      | telephone; sequentially numbered, opaque, sealed envelopes),          |       |
| 3  |                        |                      | describing any steps to conceal the sequence until interventions are  |       |
| 4  |                        |                      | assigned                                                              |       |
| 5  |                        |                      |                                                                       |       |
| 6  |                        |                      |                                                                       |       |
| 7  |                        |                      |                                                                       |       |
| 8  | Allocation:            | <a href="#">#16c</a> | Who will generate the allocation sequence, who will enrol             | 6     |
| 9  | implementation         |                      | participants, and who will assign participants to interventions       |       |
| 10 |                        |                      |                                                                       |       |
| 11 | Blinding (masking)     | <a href="#">#17a</a> | Who will be blinded after assignment to interventions (eg, trial      | n/a   |
| 12 |                        |                      | participants, care providers, outcome assessors, data analysts), and  |       |
| 13 |                        |                      | how                                                                   |       |
| 14 |                        |                      |                                                                       |       |
| 15 |                        |                      |                                                                       |       |
| 16 |                        |                      |                                                                       |       |
| 17 | Blinding (masking):    | <a href="#">#17b</a> | If blinded, circumstances under which unblinding is permissible,      | n/a   |
| 18 | emergency unblinding   |                      | and procedure for revealing a participant's allocated intervention    |       |
| 19 |                        |                      | during the trial                                                      |       |
| 20 |                        |                      |                                                                       |       |
| 21 |                        |                      |                                                                       |       |
| 22 | <b>Methods: Data</b>   |                      |                                                                       |       |
| 23 | <b>collection,</b>     |                      |                                                                       |       |
| 24 | <b>management, and</b> |                      |                                                                       |       |
| 25 | <b>analysis</b>        |                      |                                                                       |       |
| 26 |                        |                      |                                                                       |       |
| 27 |                        |                      |                                                                       |       |
| 28 |                        |                      |                                                                       |       |
| 29 | Data collection plan   | <a href="#">#18a</a> | Plans for assessment and collection of outcome, baseline, and other   | 10    |
| 30 |                        |                      | trial data, including any related processes to promote data quality   |       |
| 31 |                        |                      | (eg, duplicate measurements, training of assessors) and a             |       |
| 32 |                        |                      | description of study instruments (eg, questionnaires, laboratory      |       |
| 33 |                        |                      | tests) along with their reliability and validity, if known. Reference |       |
| 34 |                        |                      | to where data collection forms can be found, if not in the protocol   |       |
| 35 |                        |                      |                                                                       |       |
| 36 |                        |                      |                                                                       |       |
| 37 |                        |                      |                                                                       |       |
| 38 |                        |                      |                                                                       |       |
| 39 | Data collection plan:  | <a href="#">#18b</a> | Plans to promote participant retention and complete follow-up,        | 7     |
| 40 | retention              |                      | including list of any outcome data to be collected for participants   |       |
| 41 |                        |                      | who discontinue or deviate from intervention protocols                |       |
| 42 |                        |                      |                                                                       |       |
| 43 |                        |                      |                                                                       |       |
| 44 | Data management        | <a href="#">#19</a>  | Plans for data entry, coding, security, and storage, including any    | 11-12 |
| 45 |                        |                      | related processes to promote data quality (eg, double data entry;     |       |
| 46 |                        |                      | range checks for data values). Reference to where details of data     |       |
| 47 |                        |                      | management procedures can be found, if not in the protocol            |       |
| 48 |                        |                      |                                                                       |       |
| 49 |                        |                      |                                                                       |       |
| 50 |                        |                      |                                                                       |       |
| 51 | Statistics: outcomes   | <a href="#">#20a</a> | Statistical methods for analysing primary and secondary outcomes.     | 12    |
| 52 |                        |                      | Reference to where other details of the statistical analysis plan can |       |
| 53 |                        |                      | be found, if not in the protocol                                      |       |
| 54 |                        |                      |                                                                       |       |
| 55 |                        |                      |                                                                       |       |
| 56 | Statistics: additional | <a href="#">#20b</a> | Methods for any additional analyses (eg, subgroup and adjusted        | 12    |
| 57 | analyses               |                      | analyses)                                                             |       |
| 58 |                        |                      |                                                                       |       |
| 59 |                        |                      |                                                                       |       |
| 60 |                        |                      |                                                                       |       |

|    |                            |                      |                                                                         |       |
|----|----------------------------|----------------------|-------------------------------------------------------------------------|-------|
| 1  | Statistics: analysis       | <a href="#">#20c</a> | Definition of analysis population relating to protocol non-             | 12    |
| 2  | population and missing     |                      | adherence (eg, as randomised analysis), and any statistical methods     |       |
| 3  | data                       |                      | to handle missing data (eg, multiple imputation)                        |       |
| 4  |                            |                      |                                                                         |       |
| 5  |                            |                      |                                                                         |       |
| 6  | <b>Methods: Monitoring</b> |                      |                                                                         |       |
| 7  |                            |                      |                                                                         |       |
| 8  |                            |                      |                                                                         |       |
| 9  | Data monitoring:           | <a href="#">#21a</a> | Composition of data monitoring committee (DMC); summary of its          | 11-12 |
| 10 | formal committee           |                      | role and reporting structure; statement of whether it is independent    |       |
| 11 |                            |                      | from the sponsor and competing interests; and reference to where        |       |
| 12 |                            |                      | further details about its charter can be found, if not in the protocol. |       |
| 13 |                            |                      | Alternatively, an explanation of why a DMC is not needed                |       |
| 14 |                            |                      |                                                                         |       |
| 15 |                            |                      |                                                                         |       |
| 16 |                            |                      |                                                                         |       |
| 17 | Data monitoring:           | <a href="#">#21b</a> | Description of any interim analyses and stopping guidelines,            | 11-12 |
| 18 | interim analysis           |                      | including who will have access to these interim results and make        |       |
| 19 |                            |                      | the final decision to terminate the trial                               |       |
| 20 |                            |                      |                                                                         |       |
| 21 |                            |                      |                                                                         |       |
| 22 | Harms                      | <a href="#">#22</a>  | Plans for collecting, assessing, reporting, and managing solicited      | 11-12 |
| 23 |                            |                      | and spontaneously reported adverse events and other unintended          |       |
| 24 |                            |                      | effects of trial interventions or trial conduct                         |       |
| 25 |                            |                      |                                                                         |       |
| 26 |                            |                      |                                                                         |       |
| 27 |                            |                      |                                                                         |       |
| 28 | Auditing                   | <a href="#">#23</a>  | Frequency and procedures for auditing trial conduct, if any, and        | n/a   |
| 29 |                            |                      | whether the process will be independent from investigators and the      |       |
| 30 |                            |                      | sponsor                                                                 |       |
| 31 |                            |                      |                                                                         |       |
| 32 |                            |                      |                                                                         |       |
| 33 | <b>Ethics and</b>          |                      |                                                                         |       |
| 34 | <b>dissemination</b>       |                      |                                                                         |       |
| 35 |                            |                      |                                                                         |       |
| 36 |                            |                      |                                                                         |       |
| 37 | Research ethics            | <a href="#">#24</a>  | Plans for seeking research ethics committee / institutional review      | 15    |
| 38 | approval                   |                      | board (REC / IRB) approval                                              |       |
| 39 |                            |                      |                                                                         |       |
| 40 |                            |                      |                                                                         |       |
| 41 | Protocol amendments        | <a href="#">#25</a>  | Plans for communicating important protocol modifications (eg,           | 15    |
| 42 |                            |                      | changes to eligibility criteria, outcomes, analyses) to relevant        |       |
| 43 |                            |                      | parties (eg, investigators, REC / IRBs, trial participants, trial       |       |
| 44 |                            |                      | registries, journals, regulators)                                       |       |
| 45 |                            |                      |                                                                         |       |
| 46 |                            |                      |                                                                         |       |
| 47 | Consent or assent          | <a href="#">#26a</a> | Who will obtain informed consent or assent from potential trial         | 15    |
| 48 |                            |                      | participants or authorised surrogates, and how (see Item 32)            |       |
| 49 |                            |                      |                                                                         |       |
| 50 |                            |                      |                                                                         |       |
| 51 | Consent or assent:         | <a href="#">#26b</a> | Additional consent provisions for collection and use of participant     | n/a   |
| 52 | ancillary studies          |                      | data and biological specimens in ancillary studies, if applicable       |       |
| 53 |                            |                      |                                                                         |       |
| 54 |                            |                      |                                                                         |       |
| 55 | Confidentiality            | <a href="#">#27</a>  | How personal information about potential and enrolled participants      | 15    |
| 56 |                            |                      | will be collected, shared, and maintained in order to protect           |       |
| 57 |                            |                      | confidentiality before, during, and after the trial                     |       |
| 58 |                            |                      |                                                                         |       |
| 59 |                            |                      |                                                                         |       |
| 60 |                            |                      |                                                                         |       |

|    |                                             |                      |                                                                                                                                                                                                                                                                                     |     |
|----|---------------------------------------------|----------------------|-------------------------------------------------------------------------------------------------------------------------------------------------------------------------------------------------------------------------------------------------------------------------------------|-----|
| 1  | Declaration of interests                    | <a href="#">#28</a>  | Financial and other competing interests for principal investigators for the overall trial and each study site                                                                                                                                                                       | 15  |
| 2  |                                             |                      |                                                                                                                                                                                                                                                                                     |     |
| 3  |                                             |                      |                                                                                                                                                                                                                                                                                     |     |
| 4  | Data access                                 | <a href="#">#29</a>  | Statement of who will have access to the final trial dataset, and disclosure of contractual agreements that limit such access for investigators                                                                                                                                     | 12  |
| 5  |                                             |                      |                                                                                                                                                                                                                                                                                     |     |
| 6  |                                             |                      |                                                                                                                                                                                                                                                                                     |     |
| 7  |                                             |                      |                                                                                                                                                                                                                                                                                     |     |
| 8  |                                             |                      |                                                                                                                                                                                                                                                                                     |     |
| 9  |                                             |                      |                                                                                                                                                                                                                                                                                     |     |
| 10 | Ancillary and post trial care               | <a href="#">#30</a>  | Provisions, if any, for ancillary and post-trial care, and for compensation to those who suffer harm from trial participation                                                                                                                                                       | n/a |
| 11 |                                             |                      |                                                                                                                                                                                                                                                                                     |     |
| 12 |                                             |                      |                                                                                                                                                                                                                                                                                     |     |
| 13 |                                             |                      |                                                                                                                                                                                                                                                                                     |     |
| 14 | Dissemination policy: trial results         | <a href="#">#31a</a> | Plans for investigators and sponsor to communicate trial results to participants, healthcare professionals, the public, and other relevant groups (eg, via publication, reporting in results databases, or other data sharing arrangements), including any publication restrictions | 15  |
| 15 |                                             |                      |                                                                                                                                                                                                                                                                                     |     |
| 16 |                                             |                      |                                                                                                                                                                                                                                                                                     |     |
| 17 |                                             |                      |                                                                                                                                                                                                                                                                                     |     |
| 18 |                                             |                      |                                                                                                                                                                                                                                                                                     |     |
| 19 |                                             |                      |                                                                                                                                                                                                                                                                                     |     |
| 20 |                                             |                      |                                                                                                                                                                                                                                                                                     |     |
| 21 | Dissemination policy: authorship            | <a href="#">#31b</a> | Authorship eligibility guidelines and any intended use of professional writers                                                                                                                                                                                                      | 15  |
| 22 |                                             |                      |                                                                                                                                                                                                                                                                                     |     |
| 23 |                                             |                      |                                                                                                                                                                                                                                                                                     |     |
| 24 | Dissemination policy: reproducible research | <a href="#">#31c</a> | Plans, if any, for granting public access to the full protocol, participant-level dataset, and statistical code                                                                                                                                                                     | n/a |
| 25 |                                             |                      |                                                                                                                                                                                                                                                                                     |     |
| 26 |                                             |                      |                                                                                                                                                                                                                                                                                     |     |
| 27 |                                             |                      |                                                                                                                                                                                                                                                                                     |     |
| 28 | <b>Appendices</b>                           |                      |                                                                                                                                                                                                                                                                                     |     |
| 29 |                                             |                      |                                                                                                                                                                                                                                                                                     |     |
| 30 |                                             |                      |                                                                                                                                                                                                                                                                                     |     |
| 31 | Informed consent materials                  | <a href="#">#32</a>  | Model consent form and other related documentation given to participants and authorised surrogates                                                                                                                                                                                  | n/a |
| 32 |                                             |                      |                                                                                                                                                                                                                                                                                     |     |
| 33 |                                             |                      |                                                                                                                                                                                                                                                                                     |     |
| 34 | Biological specimens                        | <a href="#">#33</a>  | Plans for collection, laboratory evaluation, and storage of biological specimens for genetic or molecular analysis in the current trial and for future use in ancillary studies, if applicable                                                                                      | n/a |
| 35 |                                             |                      |                                                                                                                                                                                                                                                                                     |     |
| 36 |                                             |                      |                                                                                                                                                                                                                                                                                     |     |
| 37 |                                             |                      |                                                                                                                                                                                                                                                                                     |     |
| 38 |                                             |                      |                                                                                                                                                                                                                                                                                     |     |
| 39 |                                             |                      |                                                                                                                                                                                                                                                                                     |     |

40 The SPIRIT Explanation and Elaboration paper is distributed under the terms of the Creative Commons  
 41 Attribution License CC-BY-NC. This checklist was completed on 01. February 2023 using  
 42 <https://www.goodreports.org/>, a tool made by the [EQUATOR Network](#) in collaboration with [Penelope.ai](#)  
 43

# BMJ Open

## Effects of training involving patterned sensory enhancement on improving upper-limb movements in patients with Parkinson's disease: protocol of a randomised controlled trial

|                                 |                                                                                                                                                                                                                                                                                         |
|---------------------------------|-----------------------------------------------------------------------------------------------------------------------------------------------------------------------------------------------------------------------------------------------------------------------------------------|
| Journal:                        | <i>BMJ Open</i>                                                                                                                                                                                                                                                                         |
| Manuscript ID                   | bmjopen-2023-072416.R1                                                                                                                                                                                                                                                                  |
| Article Type:                   | Protocol                                                                                                                                                                                                                                                                                |
| Date Submitted by the Author:   | 15-Jun-2023                                                                                                                                                                                                                                                                             |
| Complete List of Authors:       | FAN, Wei; The Hong Kong Polytechnic University, Department of Rehabilitation Sciences<br>Fong, Kenneth N. K.; The Hong Kong Polytechnic University, Department of Rehabilitation Sciences<br>Wang, Shu-Mei; The Hong Kong Polytechnic University, Department of Rehabilitation Sciences |
| <b>Primary Subject Heading</b>: | Rehabilitation medicine                                                                                                                                                                                                                                                                 |
| Secondary Subject Heading:      | Sports and exercise medicine                                                                                                                                                                                                                                                            |
| Keywords:                       | REHABILITATION MEDICINE, Parkinson-s disease < NEUROLOGY, Clinical trials < THERAPEUTICS                                                                                                                                                                                                |
|                                 |                                                                                                                                                                                                                                                                                         |

SCHOLARONE™  
Manuscripts

1  
2  
3 **Effects of training involving patterned sensory enhancement on improving upper-limb**  
4  
5 **movements in patients with Parkinson's disease: protocol of a randomised controlled trial**  
6

7 Wei Fan<sup>1</sup>, Kenneth N. K. Fong<sup>1</sup>, Shu-Mei Wang<sup>1</sup>  
8  
9

10  
11  
12 *<sup>1</sup> Department of Rehabilitation Sciences, The Hong Kong Polytechnic University, Hung Hom,*  
13  
14 *Kowloon, Hong Kong*  
15

16  
17  
18  
19 Correspondence to: Dr. Shu-Mei Wang; [shumei.wang@polyu.edu.hk](mailto:shumei.wang@polyu.edu.hk)  
20  
21  
22  
23  
24  
25  
26  
27  
28  
29  
30  
31  
32  
33  
34  
35  
36  
37  
38  
39  
40  
41  
42  
43  
44  
45  
46  
47  
48  
49  
50  
51  
52  
53  
54  
55  
56  
57  
58  
59  
60



## ABSTRACT

**Introduction** Bradykinesia (i.e., slow movements) is one of the most prominent symptoms of Parkinson's disease (PD) and has a negative impact on quality of life. Rhythmic auditory stimulation (RAS), a widely used and promising treatment technique, has been shown to effectively improve gait speed in PD patients. The upper-limb movements, which also suffer from bradykinesia, are essential for daily life and directly impact quality of life. The term, patterned sensory enhancement (PSE) instead of RAS, is used when movement training targets the human body except lower limbs. Up until now, scarce studies have explored effects of training involving PSE on upper-limb movements. The purpose of this study is to investigate effects of movement training involving PSE on upper-limb movement speed and function in PD patients.

**Methods and analysis** A total of 138 patients with PD will be randomly assigned into two groups: the PSE group and the no-PSE group. A 21-day upper-limb training involving PSE (for the PSE group) or without PSE (for the no-PSE group) will be provided to the patients. An assessor will administer the box and block test and the Jebsen hand function test before and after training to assess upper-limb movement speed and function. The one-way analysis of covariance will be performed. This randomised controlled trial will provide evidence supporting effectiveness of upper-limb movement training involving PSE on reducing severity of bradykinesia in PD patients.

**Ethics and dissemination** Ethical approval has been obtained from the Institutional Review Board of the Hong Kong Polytechnic University with the reference number HSEARS20221027005. Informed consent forms will be gathered from all patients before their participation. Study results will be disseminated through conferences and peer-reviewed academic journals.

1  
2  
3  
4  
5  
6  
7  
8  
9  
10  
11  
12  
13  
14  
15  
16  
17  
18  
19  
20  
21  
22  
23  
24  
25  
26  
27  
28  
29  
30  
31  
32  
33  
34  
35  
36  
37  
38  
39  
40  
41  
42  
43  
44  
45  
46  
47  
48  
49  
50  
51  
52  
53  
54  
55  
56  
57  
58  
59  
60

**Trial registration number** ClinicalTrials.gov NCT05637593

**Keywords** Acoustic stimulation, Parkinson’s disease, Arm, Movement, Bradykinesia

For peer review only

### Strengths and limitations of this study

- This is a randomised controlled trial with one experimental group with PD receiving 21-day upper-limb movement training with the aid of PSE and one control group with PD receiving the same training without the aid of PSE.
- PSE is three tempi of metronome beat that are based on the participant's fastest upper-limb movement speed before the training and gradually increase by each week.
- Movement speed and quality are assessed using the box and block test and the Jebsen hand function test.
- One possible concern of this training combining face-to-face sessions and home training sessions is whether participants will adhere to the home training protocol, which will be addressed via real-time video meetings during all home training sessions.

## INTRODUCTION

Parkinson's disease (PD) is a common neurodegenerative disease caused by neurodegeneration of the substantia nigra, resulting in a decrease in dopamine [1, 2]. The incidence of PD is 14 per 100,000 people per year, and even reaches 160 per 100,000 people over the age of 65 years [3]. Dopamine, a neurotransmitter, is important for the function of the basal ganglia in receiving, modulating, and transmitting signals to various cortical areas, including those associated with movements [4]. Therefore, in PD patients, a decrease in dopamine leads to basal ganglia dysfunction in the cortico-striato-thalamo-cortical circuit, resulting in movement symptoms [5, 6]. Bradykinesia, meaning slowness of movements, is one of the most prominent symptoms of PD [7], extensively interferes with performances of daily activities such as eating, writing, and walking [8], and substantially lowers the quality of life in patients [9, 10].

Pharmacotherapy has been shown to alleviate movement symptoms in PD patients. Medications, such as levodopa, are able to adjust activities of the putamen and thalamus, modulate signals from basal ganglia to motor-related cortices, and thus enhance movements in patients [11]. However, long-term use of medications increases medication resistance and thus reduces therapeutic effects, as well as increases side effects of medications such as dyskinesia [12, 13]. Therefore, developing non-pharmacological therapies is warranted and of clinical importance in order to tackle bradykinesia in patients with PD.

Rhythmic auditory stimulation (RAS) is repetitive, discrete sounds with a tempo [14, 15]. Because the tempo of human movements is naturally synchronized with the tempo of RAS [16, 17], RAS has a high potential of being applied to movement training to guide human movement execution [18]. Earlier studies [19] have provided solid evidence that training involving RAS is effective in improving gait performance in PD patients. Earlier classic research [20] examining effects of training involving RAS on gaits in PD patients provided 21-day training with 30

1  
2  
3 minutes per day, in which RAS with three different tempi (normal RAS, quick RAS, and fast  
4 RAS) was provided. Initially, researchers assessed the baseline walking tempo without the aid of  
5 RAS for each patient. For daily training, each patient was given normal RAS (100% of the  
6 baseline tempo), quick RAS (105% of the baseline tempo), and fast RAS (110% of the baseline  
7 tempo) to guide the gaits. Each RAS was increased by 5% when the time went to the next week.  
8  
9

10  
11  
12  
13  
14  
15 The term, patterned sensory enhancement (PSE) instead of RAS, is used when movement  
16 training targets the human body except lower limbs [21]. Most previous studies that investigated  
17 RAS effects in PD patients focused on lower-limb movements such as gaits [19]. However,  
18 upper-limb movements are also important for activities of daily living and directly affect quality  
19 of life in humans [22]. In addition, it is commonly seen that rehabilitation training for upper-limb  
20 movements involves continuous movement repetition, which supports that PSE may be  
21 applicable to upper-limb movement therapy. It is worth investigating if upper-limb training  
22 involving PSE is effective for PD patients. To date, only few studies [23, 24] have investigated  
23 effects of PSE on upper-limb movements in PD patients. A case report [23] indicated that  
24 movement training involving PSE may improve finger-tapping speed and finger dexterity in PD  
25 patients. In addition, a study using the repeated measures design [24] demonstrated that faster  
26 PSE immediately induced faster upper-limb movement speed in PD patients. To date, randomised  
27 controlled trials have been needed to determine whether long-term training involving PSE is  
28 effective in improving upper-limb movement speed and function in PD patients.  
29  
30  
31  
32  
33  
34  
35  
36  
37  
38  
39  
40  
41  
42  
43  
44  
45

46  
47 It has been suggested that training involving RAS/PSE establishes an internal sense of  
48 rhythm in humans because humans keep anticipating subsequent beats of RAS/PSE [15]. The  
49 established sense of rhythms persists in humans and keeps affecting movement execution even  
50 after RAS/PSE disappears [15, 25]. In addition, powerful influences of RAS/PSE on movements  
51 may also be associated with plentiful neural connections between auditory and motor cortices,  
52  
53  
54  
55  
56  
57  
58  
59  
60

1  
2  
3 including the cortico-striato-cortical pathway, the cortico-cerebello-cortical pathway, and  
4  
5 auditory-motor neural connections directly in the cortex [26]. Earlier research [27–30] has  
6  
7 reported that RAS/PSE not only activates neurons in the auditory cortex, but also induces neural  
8  
9 firing in motor-related cortical regions (such as primary motor cortex, premotor, and  
10  
11 supplementary motor areas) even though examinees are stationary without moving. In PD  
12  
13 patients, RAS/PSE improves movements possibly by involving the cortico-cerebello-cortical  
14  
15 pathway and auditory-motor cortical connections to modulate neural activity of the motor cortex  
16  
17 and bypassing the damaged cortico-striato-cortical pathway [26, 31]. Additionally, RAS/PSE  
18  
19 serves as external cues, can provide timing (tempo) information for PD patients, and thus  
20  
21 possibly reduces the dependence of patients' movements on impaired modulation function of  
22  
23 basal ganglia [15].  
24  
25  
26  
27

28 To sum up, the purpose of this study is to investigate effects of movement training involving  
29  
30 PSE on upper-limb movement speed and function in PD patients. We hypothesize that movement  
31  
32 training involving PSE improves upper-limb movement speed and function in PD patients.  
33  
34 Validation of this hypothesis will fill up the knowledge gap regarding whether PSE is applicable  
35  
36 to upper-limb training in the PD population and provide clinicians with evidence of non-  
37  
38 pharmacological therapy for upper-limb bradykinesia in PD patients. The training program will  
39  
40 serve as a reference for clinical practitioners who are interested in using RAS/PSE in clinical  
41  
42 training for PD patients.  
43  
44  
45

## 46 **METHODS AND ANALYSIS**

47  
48  
49 This study follows the SPIRIT (Standard Protocol Items Recommendations for  
50  
51 Interventional Trials) guidelines for reporting [32].  
52  
53  
54  
55  
56  
57  
58  
59  
60

### *Study design*

A randomised controlled trial will be used to validate the hypothesis. Patients with PD will be randomly assigned to two groups by using computer-generated random numbers: the PSE group and the no-PSE group. Each sealed envelope with an assigned group will be used. The PSE group will receive upper-limb movement training with the aid of PSE; the no-PSE group will receive upper-limb movement training without the aid of PSE. This study will provide 21-day training with a session per day and 40 minutes per session. Assessments will be completed face-to-face before and after the 21-day training by a senior therapist who is blinded to the group allocation. Blinding of patients and people who provide training is not feasible in this study because patients and training providers know group allocation. For all participants, training and assessments will be performed during the 'on' state of their anti-Parkinson medication. We will conduct weekly face-to-face meetings with patients and real-time video meetings during all home training sessions to ensure the adherence of participants to the training program. We will monitor muscle fatigue during home training by using a daily training log. The study is expected to commence in August of 2023 and is anticipated to be completed within two years.

### *Patient and public involvement*

Patients were involved in the design and dissemination of this research. We carefully designed the training duration and content to prevent fatigue in patients according to literature and our pilot study [24]. In addition, we will share key findings of this study with participants at the end of the study.

### *Participants*

Patients with PD will be recruited from hospitals through posters and physician referrals. At pretest, this study will collect demographic and clinical data, including age, gender, disease duration, the more-affected side, and medication dosage. The more-affected side (left or right)

1  
2  
3 refers to the side of the body exhibiting more severe bradykinesia, which will be determined  
4  
5 visually by an experienced physician. In addition, we will calculate the levodopa equivalent dose  
6  
7 [33] to measure medication dosage. Criteria for selecting patients are as follows: (a) idiopathic  
8  
9 PD diagnosed by a neurologist based on the Movement Disorders Society clinical diagnostic  
10  
11 criteria [34]; (b) the Hoehn and Yahr stage is 2 or 3, meaning that bilateral movement problems  
12  
13 or combination with mild postural instability [35]; (c) a score of Montreal Cognitive Assessment  
14  
15 is equal to or higher than 21 to ensure that they understand experimental instructions [36–38]; (d)  
16  
17 a score of Edinburgh Handedness Inventory is above 60 to ensure that they are right-handed [39];  
18  
19 (e) Types and doses of medications remain unchanged in the past month right before  
20  
21 participation. Exclusion criteria include the presence of medical conditions or diseases that may  
22  
23 affect hand movements, vision, or hearing based on self-report. Patients will sign an informed  
24  
25 consent form prior to admission to this study.  
26  
27  
28  
29

### 30 *Sample size estimation*

31  
32  
33 Because of no existing PD studies testing effects of training involving PSE on upper-limb  
34  
35 movements, we calculated the effect size of training involving PSE ( $f = 0.255$ ) according to data  
36  
37 of the classic study [20] examining effects of training involving RAS on gait speed in PD  
38  
39 patients. The G\*Power software (version 3.1.9.7) was used to estimate the required sample size  
40  
41 under the following conditions: analysis of covariance as the statistical test, an effect size  $f$  of  
42  
43 0.255, the power of 0.8, the alpha level of 0.05, two groups, and 10 covariates (age, gender, the  
44  
45 Hoehn and Yahr stage, disease duration, the more-affected side, medication dosage, the number  
46  
47 of training sessions the participant completes, the score of the depression item in the first part of  
48  
49 the Movement Disorder Society-sponsored revision of the unified Parkinson's disease rating scale  
50  
51 (MDS-UPDRS) at pretest, the score of the anxiety item in the first part of MDS-UPDRS at  
52  
53 pretest, and a pretest score of an outcome variable, including the score of the box and block test  
54  
55  
56  
57  
58  
59  
60



1  
2  
3 (BBT), the error rate during executing BBT, the score of the Jebsen hand function test (JHFT),  
4  
5 and the domain score of the third part of MDS-UPDRS). The estimated total sample size was  
6  
7 124. Considering the dropout rate of 10%, the final total sample size was 138 patients (69  
8  
9 patients per group).

### 10 11 12 *Intervention*

13  
14 Patients with PD will be randomly assigned into two groups (the PSE group and the no-PSE  
15  
16 group). Three-week training will be provided for both groups. The training protocol is mainly  
17  
18 based on the classic study [20] examining effects of RAS on gait speed in PD patients and a  
19  
20 recent study [40] examining effects of PSE on upper-limb movements in the population  
21  
22 exhibiting movement slowness. We increase the frequency of breaks during training per day  
23  
24 because our pilot study [24] observed that patients with PD had muscle fatigue easily when  
25  
26 following PSE to execute upper-limb movements without frequent breaks. The training task of  
27  
28 this study will be to use the right hand to move wooden beads one by one from one target bowl to  
29  
30 the main bowl on the table (Figure 1A). Three target bowls, labelled as the left, middle, and right  
31  
32 target bowl, will be placed on the table at an equal distance from the main bowl. The distance  
33  
34 between a target bowl and the main bowl will be set at 30 cm, which is 50% of the upper-limb  
35  
36 length (from the shoulder to the middle finger tip) of Hong Kong women [41], to ensure that  
37  
38 beads in the target bowls are reachable for research participants. The angles between adjacent  
39  
40 target bowls relative to the main bowl will be 30 degrees. Wooden beads with a diameter of 2 cm  
41  
42 will be put in target bowls. The main bowl will be placed in front of the patient. Patients will be  
43  
44 asked to use the right hand to take one bead at a time from the left target bowl to the main bowl,  
45  
46 repeat this movement for the middle and right target bowls, and keep repeating this order (Figure  
47  
48  
49  
50  
51  
52  
53  
54 1B).

1  
2  
3 The training sessions will be conducted during the "ON" period of medication. Specifically,  
4 the participant will be required to conduct daily training after 1 hour of taking medications. Each  
5 daily training will consist of three rounds separated by two 5-minute breaks. Each round (about  
6 10 minutes) will consist of four 2-minute training sessions with a 30-second break between two  
7 adjacent sessions. On the first day after the pretest, patients will receive the first training session  
8 face-to-face in a hospital. After the first training session, patients will carry all training materials  
9 back home for subsequent 6-day home training sessions. Family members or caregivers will be  
10 only permitted to assist in setting up the training environment and not be allowed to assist the  
11 patient during training. On the first day of each subsequent training week, patients will be asked  
12 to return to the hospital to receive a face-to-face training session. We will conduct real-time video  
13 meetings during all home training sessions to ensure adherence to the treatment plan. We will  
14 also ask participants to complete daily training logs to record training completion and monitor the  
15 degrees of fatigue. In addition, we will calculate the number of training sessions the participant  
16 completes.

17  
18 Before the first-day training, the baseline tempo of executing the training task will be  
19 assessed for each patient. The patient will be required to perform the aforementioned upper-limb  
20 movement task as fast as possible within 30 seconds for three times without listening to PSE. The  
21 obtained average number of wooden beads in the main bowl multiplied by two will be the  
22 baseline tempo (unit: beat per minute) for each patient [15, 20].

23  
24 For the PSE group, each patient will receive a 45-minute audio file, which includes briefing  
25 the patient about the daily training content (five minutes) and providing PSE (10 minutes per  
26 round multiplied by three rounds, plus two 5-minute break times; a total of 40 minutes). The  
27 normal PSE (100% of the baseline tempo), the quick PSE (105% of the baseline tempo), and the  
28 fast PSE (110% of the baseline tempo) will be provided in the first, second, and third round of

training (Table 1). The patient will be asked to pick up a bead when s/he hears a beep sound of PSE. The tempo of the three PSE will be further increased by 5% of the baseline tempo when it goes to a new week. In the face-to-face session (the first day) of each week, the patient will obtain a new audio file and complete daily training face-to-face in the hospital. PSE will be metronome beep sounds generated by a metronome (SQ200, Seiko incorporated). The required tempo of PSE will be adjusted using the computer software Adobe Audition CC 2020. The audio file will be sent to the patient's mobile phone, which will then be used to play the audio file during both face-to-face and home training.

**Table 1.** PSE tempi that are provided in daily upper-limb training

| Day                                 | 1 <sup>st</sup> round: Normal PSE | 2 <sup>nd</sup> round: Quick PSE | 3 <sup>rd</sup> round: Fast PSE |
|-------------------------------------|-----------------------------------|----------------------------------|---------------------------------|
| 1 <sup>st</sup> – 7 <sup>th</sup>   | 100% of the baseline tempo        | 105% of the baseline tempo       | 110% of the baseline tempo      |
| 8 <sup>th</sup> – 14 <sup>th</sup>  | 105% of the baseline tempo        | 110% of the baseline tempo       | 115% of the baseline tempo      |
| 15 <sup>th</sup> – 21 <sup>st</sup> | 110% of the baseline tempo        | 115% of the baseline tempo       | 120% of the baseline tempo      |

PSE, patterned sensory enhancement.

The no-PSE group will receive a 45-minute audio file, which briefs the patient about the daily training content (five minutes) and instructs the patient to move beads as fast as possible in each round without PSE. The training protocol is the same in the PSE group and the no-PSE group, except no PSE is provided for the no-PSE group during training. Similarly, the no-PSE group will perform the training face-to-face on the first day of each week in the hospital and at home on the remaining six days of a week.

1  
2  
3 Our previous empirical study has reported immediate effects of PSE on inducing faster  
4 upper-limb movements in PD patients [24]. However, we observed that although PSE with the  
5 speed of 110% and 120% of the baseline tempo was effective, patients had muscle fatigue easily  
6 when following the beat of PSE on an upper-limb movement task. This study protocol provides  
7 daily 40-minute upper-limb movement training at the fastest speed for 40 minutes, which is very  
8 intensive and easily causes muscle fatigue. To reduce muscle fatigue in patients, we will adopt  
9 PSE with the tempo speed starting from 100%, 105%, and 110% of the baseline tempo in the  
10 first-week training instead of 100%, 110%, and 120%, and will increase the frequency of training  
11 breaks.  
12  
13  
14  
15  
16  
17  
18  
19  
20  
21  
22  
23

#### 24 *Outcome measures*

25  
26 The MDS-UPDRS is a commonly used tool in clinical settings and research to assess  
27 influences of PD on multiple aspects in patients [35]. It consists of four parts, including (the first  
28 part) non-motor subjective experiences of daily living, (the second part) motor-related subjective  
29 experiences of daily living, (the third part) the motor examination, and (the fourth part) motor  
30 complications [35]. We will calculate the domain score of the third part of MDS-UPDRS, which  
31 is used to reflect objective severity of movement symptoms in patients. Larger scores indicate  
32 more severe movement symptoms. We will also use the score of the depression item and that of  
33 the anxiety item separately in the first part of MDS-UPDRS to detect levels of depression and  
34 anxiety in patients.  
35  
36  
37  
38  
39  
40  
41  
42  
43  
44  
45

46  
47 The BBT is used to measure gross manual dexterity as well as upper-limb movement speed  
48 [42]. It is a 53.7\* 25.4 cm box separated into two compartments by a 15.2 cm high erected  
49 partition, with 150 blocks in each compartment. Starting from the dominant hand, patients will be  
50 asked to move the blocks one by one from the compartment on the hand side to the opposite side  
51 (e.g., move the blocks from the right compartment to the left compartment for the right hand  
52  
53  
54  
55  
56  
57  
58  
59  
60

1  
2  
3 test). Patients should move the blocks with their arms raised and crossed over the partition. They  
4  
5 have one minute to move the blocks as fast as possible. The score of BBT for each hand is the  
6  
7 number of blocks that are successfully transferred between compartments in one minute. A  
8  
9 higher BBT score indicates faster upper-limb movements and better dexterity. In addition, the  
10  
11 number of dropping blocks during the blocks moving tasks of BBT in each hand will be recorded  
12  
13 as the error score. We will calculate the error rate of executing BBT in each hand by dividing the  
14  
15 error score by the sum of the error score and the BBT score to assess the accuracy of upper-limb  
16  
17 movements. The higher error rate indicates less accurate upper-limb movements. For the elderly,  
18  
19 the BBT has high test-retest reliability (intraclass correlation coefficient of 0.89 to 0.97) and  
20  
21 construct validity [43].  
22  
23  
24  
25

26 The JHFT is used to assess unimanual hand function when examinees perform daily  
27  
28 activities. Seven items are included in JHFT: writing, turning cards, picking up small objects,  
29  
30 simulated feeding, stacking checkers, moving large light objects, and moving large heavy objects  
31  
32 [44]. Considering that the patients are Chinese speakers, it is not appropriate to do English  
33  
34 writing. According to a previous study conducted in Chinese cultures [45], the JHFT could be  
35  
36 modified by excluding the writing item to avoid cultural influences on scores. The score for each  
37  
38 item is the completion time. The less time a patient takes, the better hand function s/he has. We  
39  
40 will calculate the total score of these six items as one dependent variable. The JHFT has excellent  
41  
42 test-retest reliability (intraclass correlation coefficients of 0.89 to 0.97) for PD patients [46].  
43  
44  
45  
46

### 47 *Safety*

48  
49 To assess the data safety, scientific validity, and integrity of clinical trials, a data monitoring  
50  
51 committee will be formed by two senior researchers who are not involved in the group allocation  
52  
53 and protocol implications. After the study is completed, the research data will be retained for five  
54  
55 years and destroyed afterwards. In this study, adverse events, defined as any unfavorable medical  
56  
57  
58  
59  
60

1  
2  
3 occurrence in a patient, will be collected and reported to data monitoring committee for records.

4  
5 This study will provide movement training. If participants have muscle fatigue during training,  
6  
7 research personnel will provide break time immediately.  
8

9  
10 *Data collection and statistical analysis*

11  
12 The general information and results will be kept on a portable hard drive. Authors of this  
13  
14 study will conduct an interim analysis to re-estimate the required sample size and determine if the  
15  
16 study should continue or be modified. Only authors of this study will be allowed to get access to  
17  
18 the dataset.  
19

20  
21 A one-way analysis of covariance will be conducted to examine effects of group (the PSE  
22  
23 group versus the no-PSE group) on each dependent variable, including BBT scores, the error rate  
24  
25 during executing BBT, JHFT scores, and the domain score of the third part of MDS-UPDRS at  
26  
27 posttest. The 10 potential confounding factors are age, gender, the Hoehn and Yahr stage, disease  
28  
29 duration, the more-affected side, medication dosage, the number of training sessions the  
30  
31 participant completes, the score of the depression item in the first part of MDS-UPDRS at pretest,  
32  
33 the score of the anxiety item in the first part of MDS-UPDRS at pretest, and a pretest score of an  
34  
35 outcome variable (including BBT scores, the error rate during executing BBT, JHFT scores, and  
36  
37 the domain score of the third part of MDS-UPDRS). The alpha level (two-tailed) will be set at  
38  
39 0.05. It is hypothesized that after controlling for confounding influences, PSE increases scores of  
40  
41 BBT, and decreases JHFT scores, the domain score of the third part of MDS-UPDRS, and the  
42  
43 error rate of BBT. Patients may drop out before the study is completed. The last data point of the  
44  
45 patient will be used to handle the missing data. The SPSS package (the 25th version) will be used  
46  
47 to conduct statistical analysis.  
48  
49  
50  
51  
52  
53  
54  
55  
56  
57  
58  
59  
60

## Contributors

Wei Fan: Study conception and design. Execution. Writing of the first draft.

Kenneth N. K. Fong: Review and critique.

Shu-Mei Wang: Study conception and design. Review and critique.

## Data Availability Statement:

The data supporting the findings of this study will be available upon reasonable request to the corresponding author.

## Funding

This research did not receive any specific grant from funding agencies in the public, commercial, or not-for-profit sectors.

## Competing interests:

None declared.

## Ethics and dissemination:

Ethical approval has been obtained from the Institutional Review Board of the Hong Kong Polytechnic University with the reference number HSEARS20221027005. It has been registered on ClinicalTrials.gov under the identifier NCT05637593. Patients who are eligible will be well-informed about the objectives and timeline of this study. Informed consent forms will be gathered from all patients before their participation. The general health condition of patients will be monitored via daily video meetings and weekly face-to-face meetings. Training will be suspended or terminated when there are adverse events. Study results will be disseminated through conferences and peer-reviewed academic journals. Identifiable information of patients will not be disclosed during result dissemination.

**REFERENCES**

- 1 Jastrzębowska MA, Marquis R, Melie-García L, et al. Dopaminergic modulation of motor network compensatory mechanisms in Parkinson's disease. *Hum Brain Map* 2019;40(15):4397–416.
- 2 Gale JT, Amirnovin R, Williams ZM, et al. From symphony to cacophony: pathophysiology of the human basal ganglia in Parkinson disease. *Neurosci Biobehav Rev* 2008;32(3):378–87.
- 3 Ascherio A, Schwarzschild MA. The epidemiology of Parkinson's disease: risk factors and prevention. *The Lancet Neurology* 2016;15(12):1257–72.
- 4 Haber SN, Adler A, Bergman H. The Basal Ganglia. In: *The Human Nervous System*: Elsevier 2012:678–738.
- 5 Sian J, Gerlach M, Youdim MB, et al. Parkinson's disease: a major hypokinetic basal ganglia disorder. *J Neural Transm (Vienna)* 1999;106(5-6):443–76.
- 6 Redgrave P, Rodriguez M, Smith Y, et al. Goal-directed and habitual control in the basal ganglia: implications for Parkinson's disease. *Nat Rev Neurosci* 2010;11(11):760–72.
- 7 Radhakrishnan DM, Goyal V. Parkinson's disease: A review. *Neurol India* 2018;66(Supplement):S26-S35.
- 8 Simões R, Litvan I. Bradykinesia. In: *Encyclopedia of Movement Disorders*: Elsevier 2010:158–61.
- 9 Muslimovic D, Post B, Speelman JD, et al. Determinants of disability and quality of life in mild to moderate Parkinson disease. *Neurology* 2008;70(23):2241–47.
- 10 Rajiah K, Maharajan MK, Yeen SJ, et al. Quality of life and caregivers' burden of Parkinson's disease. *Neuroepidemiology* 2017;48(3-4):131–37.



- 1  
2  
3 11 Kraft E, Loichinger W, Diepers M, et al. Levodopa-induced striatal activation in Parkinson's  
4 disease: a functional MRI study. *Parkinsonism Relat Disord* 2009;15(8):558–63.  
5  
6  
7  
8 12 Nonnekes J, Timmer MHM, Vries NM de, et al. Unmasking levodopa resistance in  
9 Parkinson's disease. *Mov Disord* 2016;31(11):1602–09.  
10  
11  
12 13 Vorovenci RJ, Biundo R, Antonini A. Therapy-resistant symptoms in Parkinson's disease. *J*  
13 *Neural Transm (Vienna)* 2016;123(1):19–30.  
14  
15  
16  
17 14 Ni M, Hazzard JB, Signorile JF, et al. Exercise guidelines for gait function in Parkinson's  
18 disease: a systematic review and meta-analysis. *Neurorehabil Neural Repair*  
19 2018;32(10):872–86.  
20  
21  
22  
23  
24 15 Nombela C, Hughes LE, Owen AM, et al. Into the groove: can rhythm influence Parkinson's  
25 disease? *Neurosci Biobehav Rev* 2013;37(10 Pt 2):2564–70.  
26  
27  
28  
29 16 Thaut MH, Abiru M. Rhythmic auditory stimulation in rehabilitation of movement  
30 disorders: a review of current research. *Music Perception* 2010;27(4):263–69.  
31  
32  
33 17 Schaffert N, Janzen TB, Mattes K, et al. A review on the relationship between sound and  
34 movement in sports and rehabilitation. *Front Psychol* 2019;10(244):244.  
35  
36  
37  
38 18 Thaut MH, McIntosh GC, Hoemberg V. Neurobiological foundations of neurologic music  
39 therapy: rhythmic entrainment and the motor system. *Front Psychol* 2014;5:1185.  
40  
41  
42 19 Ghai S, Ghai I, Schmitz G, et al. Effect of rhythmic auditory cueing on parkinsonian gait: A  
43 systematic review and meta-analysis. *Sci Rep* 2018;8(1):506.  
44  
45  
46  
47 20 Thaut MH, McIntosh GC, Rice RR, et al. Rhythmic auditory stimulation in gait training for  
48 Parkinson's disease patients. *Mov Disord* 1996;11(2):193–200.  
49  
50  
51 21 Thaut M, Hoemberg V. Handbook of neurologic music therapy: Oxford University Press,  
52 USA 2014.  
53  
54  
55  
56  
57  
58  
59  
60

- 1  
2  
3 22 Cahn DA, Sullivan EV, Shear PK, et al. Differential contributions of cognitive and motor  
4 component processes to physical and instrumental activities of daily living in Parkinson's  
5 disease. *Arch Clin Neuropsychol* 1998;13(7):575–83.  
6  
7  
8  
9  
10 23 Buard I, Dewispelaere WB, Thaut M, et al. Preliminary neurophysiological evidence of  
11 altered cortical activity and connectivity with neurologic music therapy in Parkinson's  
12 disease. *Front Neurosci* 2019;13:105.  
13  
14  
15  
16  
17 24 Fan W, Li J, Wei W, et al. Effects of rhythmic auditory stimulation on upper-limb  
18 movements in patients with Parkinson's disease. *Parkinsonism Relat Disord* 2022;101:27–  
19 30.  
20  
21  
22  
23  
24 25 Palmer C, Krumhansl CL. Mental representations for musical meter. *Journal of*  
25 *Experimental Psychology: Human Perception and Performance* 1990;16(4):728–41.  
26  
27  
28 26 Leuk JSP, Low LLN, Teo W-P. An overview of acoustic-based interventions to improve  
29 motor symptoms in Parkinson's disease. *Front Aging Neurosci* 2020;12:243.  
30  
31  
32  
33 27 Chen JL, Penhune VB, Zatorre RJ. Listening to musical rhythms recruits motor regions of  
34 the brain. *Cereb Cortex* 2008;18(12):2844–54.  
35  
36  
37  
38 28 Bengtsson SL, Ullén F, Ehrsson HH, et al. Listening to rhythms activates motor and  
39 premotor cortices. *Cortex* 2009;45(1):62–71.  
40  
41  
42 29 Koshimori Y, Thaut MH. Future perspectives on neural mechanisms underlying rhythm and  
43 music based neurorehabilitation in Parkinson's disease. *Ageing Res Rev* 2018;47:133–39.  
44  
45  
46  
47 30 Grahn JA, Rowe JB. Feeling the beat: premotor and striatal interactions in musicians and  
48 nonmusicians during beat perception. *J Neurosci* 2009;29(23):7540–48.  
49  
50  
51 31 Braunlich K, Seger CA, Jentink KG, et al. Rhythmic auditory cues shape neural network  
52 recruitment in Parkinson's disease during repetitive motor behavior. *Eur J Neurosci*  
53 2019;49(6):849–58.  
54  
55  
56  
57  
58  
59  
60

- 1  
2  
3 32 Chan A-W, Tetzlaff JM, Gøtzsche PC, et al. SPIRIT 2013 explanation and elaboration:  
4 guidance for protocols of clinical trials. *BMJ* 2013;346:e7586.  
5  
6  
7 33 Nyholm D, Jost WH. An updated calculator for determining levodopa-equivalent dose.  
8 *Neurol Res Pract* 2021;3(1):58.  
9  
10  
11 34 Postuma RB, Berg D, Stern M, et al. MDS clinical diagnostic criteria for Parkinson's  
12 disease. *Mov Disord* 2015;30(12):1591–601.  
13  
14  
15 35 Goetz CG, Tilley BC, Shaftman SR, et al. Movement Disorder Society-sponsored revision  
16 of the Unified Parkinson's Disease Rating Scale (MDS-UPDRS): scale presentation and  
17 clinimetric testing results. *Mov Disord* 2008;23(15):2129–70.  
18  
19  
20 36 Dalrymple-Alford JC, MacAskill MR, Nakas CT, et al. The MoCA: well-suited screen for  
21 cognitive impairment in Parkinson disease. *Neurology* 2010;75(19):1717–25.  
22  
23  
24 37 Wang YP, Xu GL, Yang SQ, Liu XM, Deng XY. Value of Montreal Cognitive Assessment  
25 in identifying patients with mild vascular cognitive impairment after first stroke. *Chinese*  
26 *Journal of Neuromedicine* 2010;9(5):503–07.  
27  
28  
29 38 Vitorio R, Stuart S, Gobbi LTB, et al. Reduced gait variability and enhanced brain activity  
30 in older adults with auditory cues: a functional near-infrared spectroscopy study.  
31 *Neurorehabil Neural Repair* 2018;32(11):976–87.  
32  
33  
34 39 Yang N, Waddington G, Adams R, et al. Translation, cultural adaptation, and test-retest  
35 reliability of Chinese versions of the Edinburgh Handedness Inventory and Waterloo  
36 Footedness Questionnaire. *Laterality* 2018;23(3):255–73.  
37  
38  
39 40 Wang S-M, Chan S-T, Wong Y-L, et al. Rhythmic auditory stimulation incorporated in  
40 training improved movements in individuals with psychotic-like experiences. *Eur Arch*  
41 *Psychiatry Clin Neurosci* 2022.  
42  
43  
44  
45  
46  
47  
48  
49  
50  
51  
52  
53  
54  
55  
56  
57  
58  
59  
60

- 1  
2  
3 41 Alan H.S. Chan. Upper limb length n.d. Available at:  
4  
5 <http://personal.cityu.edu.hk/meachan/Online%20Anthropometry/Chapter2/Ch2-24.htm>  
6  
7 Accessed August 21, 2022.  
8  
9
- 10 42 Mathiowetz V, Volland G, Kashman N, et al. Adult norms for the Box and Block Test of  
11  
12 manual dexterity. *Am J Occup Ther* 1985;39(6):386–91.  
13
- 14 43 Desrosiers J, Bravo G, Hébert R, et al. Validation of the Box and Block Test as a measure of  
15  
16 dexterity of elderly people: reliability, validity, and norms studies. *Arch Phys Med Rehabil*  
17  
18 1994;75(7):751–55.  
19
- 20 44 Jebsen RH, Taylor N, Trieschmann RB, et al. An objective and standardized test of hand  
21  
22 function. *Arch Phys Med Rehabil* 1969;50(6):311–19.  
23
- 24 45 Dong VA, Fong KNK, Chen Y-F, et al. 'Remind-to-move' treatment versus constraint-  
25  
26 induced movement therapy for children with hemiplegic cerebral palsy: a randomized  
27  
28 controlled trial. *Dev Med Child Neurol* 2017;59(2):160–67.  
29
- 30 46 Mak MKY, Lau ETL, Tam VWK, et al. Use of Jebsen Taylor Hand Function Test in  
31  
32 evaluating the hand dexterity in people with Parkinson's disease. *J Hand Ther*  
33  
34 2015;28(4):389-94; quiz 395.  
35  
36  
37  
38  
39  
40  
41  
42  
43  
44  
45  
46  
47  
48  
49  
50  
51  
52  
53  
54  
55  
56  
57  
58  
59  
60

1  
2  
3 **Figure captions**  
4

5 **Figure 1.** (A) The setup of the upper-limb training task. (B) The patient picks up one bead  
6 from one target bowl and is going to move the bead to the main bowl.  
7  
8  
9  
10  
11  
12  
13  
14  
15  
16  
17  
18  
19  
20  
21  
22  
23  
24  
25  
26  
27  
28  
29  
30  
31  
32  
33  
34  
35  
36  
37  
38  
39  
40  
41  
42  
43  
44  
45  
46  
47  
48  
49  
50  
51  
52  
53  
54  
55  
56  
57  
58  
59  
60

For peer review only

1  
2  
3  
4  
5  
6  
7  
8  
9  
10  
11  
12  
13  
14  
15  
16  
17  
18  
19  
20  
21  
22  
23  
24  
25  
26  
27  
28  
29  
30  
31  
32  
33  
34  
35  
36  
37  
38  
39  
40  
41  
42  
43  
44  
45  
46  
47  
48  
49  
50  
51  
52  
53  
54  
55  
56  
57  
58  
59  
60

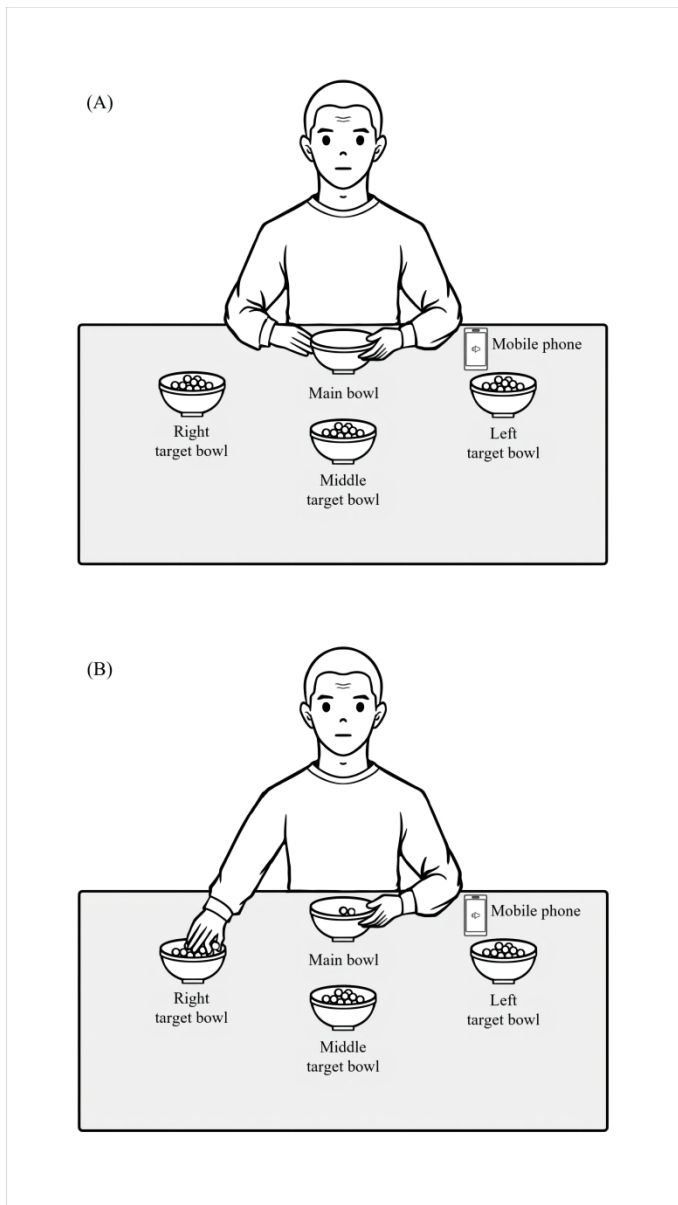

Figure 1

530x940mm (216 x 216 DPI)

# Reporting checklist for protocol of a clinical trial.

Based on the SPIRIT guidelines.

## Instructions to authors

Complete this checklist by entering the page numbers from your manuscript where readers will find each of the items listed below.

Your article may not currently address all the items on the checklist. Please modify your text to include the missing information. If you are certain that an item does not apply, please write "n/a" and provide a short explanation.

Upload your completed checklist as an extra file when you submit to a journal.

In your methods section, say that you used the SPIRIT reporting guidelines, and cite them as:

Chan A-W, Tetzlaff JM, Gøtzsche PC, Altman DG, Mann H, Berlin J, Dickersin K, Hróbjartsson A, Schulz KF, Parulekar WR, Krleža-Jerić K, Laupacis A, Moher D. SPIRIT 2013 Explanation and Elaboration: Guidance for protocols of clinical trials. *BMJ*. 2013;346:e7586

|                                   | Reporting Item                                                                                                                  | Page Number |
|-----------------------------------|---------------------------------------------------------------------------------------------------------------------------------|-------------|
| <b>Administrative information</b> |                                                                                                                                 |             |
| Title                             | <a href="#">#1</a> Descriptive title identifying the study design, population, interventions, and, if applicable, trial acronym | 1           |
| Trial registration                | <a href="#">#2a</a> Trial identifier and registry name. If not yet registered,                                                  | 2           |

|    |                     |                                                                             |     |
|----|---------------------|-----------------------------------------------------------------------------|-----|
| 1  |                     | name of intended registry                                                   |     |
| 2  |                     |                                                                             |     |
| 3  |                     |                                                                             |     |
| 4  | Trial registration: | <a href="#">#2b</a> All items from the World Health Organization Trial      | 2   |
| 5  |                     |                                                                             |     |
| 6  | data set            | Registration Data Set                                                       |     |
| 7  |                     |                                                                             |     |
| 8  |                     |                                                                             |     |
| 9  | Protocol version    | <a href="#">#3</a> Date and version identifier                              | n/a |
| 10 |                     |                                                                             |     |
| 11 |                     |                                                                             |     |
| 12 | Funding             | <a href="#">#4</a> Sources and types of financial, material, and other      | 16  |
| 13 |                     |                                                                             |     |
| 14 |                     | support                                                                     |     |
| 15 |                     |                                                                             |     |
| 16 |                     |                                                                             |     |
| 17 | Roles and           | <a href="#">#5a</a> Names, affiliations, and roles of protocol contributors | 16  |
| 18 |                     |                                                                             |     |
| 19 | responsibilities:   |                                                                             |     |
| 20 |                     |                                                                             |     |
| 21 | contributorship     |                                                                             |     |
| 22 |                     |                                                                             |     |
| 23 |                     |                                                                             |     |
| 24 |                     |                                                                             |     |
| 25 | Roles and           | <a href="#">#5b</a> Name and contact information for the trial sponsor      | 1   |
| 26 |                     |                                                                             |     |
| 27 | responsibilities:   |                                                                             |     |
| 28 |                     |                                                                             |     |
| 29 | sponsor contact     |                                                                             |     |
| 30 |                     |                                                                             |     |
| 31 | information         |                                                                             |     |
| 32 |                     |                                                                             |     |
| 33 |                     |                                                                             |     |
| 34 |                     |                                                                             |     |
| 35 | Roles and           | <a href="#">#5c</a> Role of study sponsor and funders, if any, in study     | 16  |
| 36 |                     |                                                                             |     |
| 37 | responsibilities:   | design; collection, management, analysis, and                               |     |
| 38 |                     |                                                                             |     |
| 39 | sponsor and funder  | interpretation of data; writing of the report; and the                      |     |
| 40 |                     |                                                                             |     |
| 41 |                     | decision to submit the report for publication, including                    |     |
| 42 |                     |                                                                             |     |
| 43 |                     | whether they will have ultimate authority over any of                       |     |
| 44 |                     |                                                                             |     |
| 45 |                     | these activities                                                            |     |
| 46 |                     |                                                                             |     |
| 47 |                     |                                                                             |     |
| 48 |                     |                                                                             |     |
| 49 | Roles and           | <a href="#">#5d</a> Composition, roles, and responsibilities of the         | 16  |
| 50 |                     |                                                                             |     |
| 51 | responsibilities:   | coordinating centre, steering committee, endpoint                           |     |
| 52 |                     |                                                                             |     |
| 53 | committees          | adjudication committee, data management team, and                           |     |
| 54 |                     |                                                                             |     |
| 55 |                     | other individuals or groups overseeing the trial, if                        |     |
| 56 |                     |                                                                             |     |
| 57 |                     |                                                                             |     |
| 58 |                     |                                                                             |     |
| 59 |                     |                                                                             |     |
| 60 |                     |                                                                             |     |



1 applicable (see Item 21a for data monitoring  
2  
3 committee)

4  
5  
6 **Introduction**

7  
8  
9 Background and [#6a](#) Description of research question and justification for 5-7  
10  
11 rationale undertaking the trial, including summary of relevant  
12  
13 studies (published and unpublished) examining  
14  
15 benefits and harms for each intervention  
16

17  
18  
19 Background and [#6b](#) Explanation for choice of comparators 5-7  
20  
21 rationale: choice of  
22  
23 comparators  
24

25  
26 Objectives [#7](#) Specific objectives or hypotheses 7  
27

28  
29 Trial design [#8](#) Description of trial design including type of trial (eg, 8  
30  
31 parallel group, crossover, factorial, single group),  
32  
33 allocation ratio, and framework (eg, superiority,  
34  
35 equivalence, non-inferiority, exploratory)  
36  
37

38  
39 **Methods:**

40  
41 **Participants,**  
42  
43 **interventions, and**  
44  
45 **outcomes**  
46  
47

48  
49 Study setting [#9](#) Description of study settings (eg, community clinic, 8  
50  
51 academic hospital) and list of countries where data  
52  
53 will be collected. Reference to where list of study sites  
54  
55 can be obtained  
56  
57

|    |                      |                      |                                                         |       |
|----|----------------------|----------------------|---------------------------------------------------------|-------|
| 1  | Eligibility criteria | <a href="#">#10</a>  | Inclusion and exclusion criteria for participants. If   | 8     |
| 2  |                      |                      |                                                         |       |
| 3  |                      |                      | applicable, eligibility criteria for study centres and  |       |
| 4  |                      |                      | individuals who will perform the interventions (eg,     |       |
| 5  |                      |                      | surgeons, psychotherapists)                             |       |
| 6  |                      |                      |                                                         |       |
| 7  |                      |                      |                                                         |       |
| 8  |                      |                      |                                                         |       |
| 9  |                      |                      |                                                         |       |
| 10 |                      |                      |                                                         |       |
| 11 | Interventions:       | <a href="#">#11a</a> | Interventions for each group with sufficient detail to  | 9-13  |
| 12 |                      |                      |                                                         |       |
| 13 | description          |                      | allow replication, including how and when they will be  |       |
| 14 |                      |                      | administered                                            |       |
| 15 |                      |                      |                                                         |       |
| 16 |                      |                      |                                                         |       |
| 17 |                      |                      |                                                         |       |
| 18 |                      |                      |                                                         |       |
| 19 | Interventions:       | <a href="#">#11b</a> | Criteria for discontinuing or modifying allocated       | 9-13  |
| 20 |                      |                      |                                                         |       |
| 21 | modifications        |                      | interventions for a given trial participant (eg, drug   |       |
| 22 |                      |                      | dose change in response to harms, participant           |       |
| 23 |                      |                      | request, or improving / worsening disease)              |       |
| 24 |                      |                      |                                                         |       |
| 25 |                      |                      |                                                         |       |
| 26 |                      |                      |                                                         |       |
| 27 |                      |                      |                                                         |       |
| 28 |                      |                      |                                                         |       |
| 29 | Interventions:       | <a href="#">#11c</a> | Strategies to improve adherence to intervention         | 11    |
| 30 |                      |                      |                                                         |       |
| 31 | adherence            |                      | protocols, and any procedures for monitoring            |       |
| 32 |                      |                      | adherence (eg, drug tablet return; laboratory tests)    |       |
| 33 |                      |                      |                                                         |       |
| 34 |                      |                      |                                                         |       |
| 35 |                      |                      |                                                         |       |
| 36 | Interventions:       | <a href="#">#11d</a> | Relevant concomitant care and interventions that are    | 11    |
| 37 |                      |                      |                                                         |       |
| 38 | concomitant care     |                      | permitted or prohibited during the trial                |       |
| 39 |                      |                      |                                                         |       |
| 40 |                      |                      |                                                         |       |
| 41 |                      |                      |                                                         |       |
| 42 | Outcomes             | <a href="#">#12</a>  | Primary, secondary, and other outcomes, including       | 13-14 |
| 43 |                      |                      |                                                         |       |
| 44 |                      |                      | the specific measurement variable (eg, systolic blood   |       |
| 45 |                      |                      | pressure), analysis metric (eg, change from baseline,   |       |
| 46 |                      |                      | final value, time to event), method of aggregation (eg, |       |
| 47 |                      |                      | median, proportion), and time point for each outcome.   |       |
| 48 |                      |                      |                                                         |       |
| 49 |                      |                      |                                                         |       |
| 50 |                      |                      |                                                         |       |
| 51 |                      |                      |                                                         |       |
| 52 |                      |                      |                                                         |       |
| 53 |                      |                      | Explanation of the clinical relevance of chosen         |       |
| 54 |                      |                      |                                                         |       |
| 55 |                      |                      | efficacy and harm outcomes is strongly recommended      |       |
| 56 |                      |                      |                                                         |       |
| 57 |                      |                      |                                                         |       |
| 58 |                      |                      |                                                         |       |
| 59 |                      |                      |                                                         |       |
| 60 |                      |                      |                                                         |       |

|    |                           |                      |                                                           |       |
|----|---------------------------|----------------------|-----------------------------------------------------------|-------|
| 1  | Participant timeline      | <a href="#">#13</a>  | Time schedule of enrolment, interventions (including      | 10-11 |
| 2  |                           |                      | any run-ins and washouts), assessments, and visits        |       |
| 3  |                           |                      | for participants. A schematic diagram is highly           |       |
| 4  |                           |                      | recommended (see Figure)                                  |       |
| 5  |                           |                      |                                                           |       |
| 6  |                           |                      |                                                           |       |
| 7  |                           |                      |                                                           |       |
| 8  |                           |                      |                                                           |       |
| 9  |                           |                      |                                                           |       |
| 10 |                           |                      |                                                           |       |
| 11 | Sample size               | <a href="#">#14</a>  | Estimated number of participants needed to achieve        | 9     |
| 12 |                           |                      | study objectives and how it was determined, including     |       |
| 13 |                           |                      | clinical and statistical assumptions supporting any       |       |
| 14 |                           |                      | sample size calculations                                  |       |
| 15 |                           |                      |                                                           |       |
| 16 |                           |                      |                                                           |       |
| 17 |                           |                      |                                                           |       |
| 18 |                           |                      |                                                           |       |
| 19 |                           |                      |                                                           |       |
| 20 |                           |                      |                                                           |       |
| 21 | Recruitment               | <a href="#">#15</a>  | Strategies for achieving adequate participant             | 8     |
| 22 |                           |                      | enrolment to reach target sample size                     |       |
| 23 |                           |                      |                                                           |       |
| 24 |                           |                      |                                                           |       |
| 25 |                           |                      |                                                           |       |
| 26 | <b>Methods:</b>           |                      |                                                           |       |
| 27 |                           |                      |                                                           |       |
| 28 | <b>Assignment of</b>      |                      |                                                           |       |
| 29 | <b>interventions (for</b> |                      |                                                           |       |
| 30 | <b>controlled trials)</b> |                      |                                                           |       |
| 31 |                           |                      |                                                           |       |
| 32 |                           |                      |                                                           |       |
| 33 |                           |                      |                                                           |       |
| 34 |                           |                      |                                                           |       |
| 35 |                           |                      |                                                           |       |
| 36 | Allocation: sequence      | <a href="#">#16a</a> | Method of generating the allocation sequence (eg,         | 8     |
| 37 | generation                |                      | computer-generated random numbers), and list of any       |       |
| 38 |                           |                      | factors for stratification. To reduce predictability of a |       |
| 39 |                           |                      | random sequence, details of any planned restriction       |       |
| 40 |                           |                      | (eg, blocking) should be provided in a separate           |       |
| 41 |                           |                      | document that is unavailable to those who enrol           |       |
| 42 |                           |                      | participants or assign interventions                      |       |
| 43 |                           |                      |                                                           |       |
| 44 |                           |                      |                                                           |       |
| 45 |                           |                      |                                                           |       |
| 46 |                           |                      |                                                           |       |
| 47 |                           |                      |                                                           |       |
| 48 |                           |                      |                                                           |       |
| 49 |                           |                      |                                                           |       |
| 50 |                           |                      |                                                           |       |
| 51 |                           |                      |                                                           |       |
| 52 |                           |                      |                                                           |       |
| 53 | Allocation                | <a href="#">#16b</a> | Mechanism of implementing the allocation sequence         | 8     |
| 54 | concealment               |                      | (eg, central telephone; sequentially numbered,            |       |
| 55 |                           |                      | opaque, sealed envelopes), describing any steps to        |       |
| 56 |                           |                      |                                                           |       |
| 57 |                           |                      |                                                           |       |
| 58 |                           |                      |                                                           |       |
| 59 |                           |                      |                                                           |       |
| 60 |                           |                      |                                                           |       |

|    |                        |                                                                            |       |
|----|------------------------|----------------------------------------------------------------------------|-------|
| 1  |                        | conceal the sequence until interventions are assigned                      |       |
| 2  |                        |                                                                            |       |
| 3  |                        |                                                                            |       |
| 4  | Allocation:            | <a href="#">#16c</a> Who will generate the allocation sequence, who will   | 8     |
| 5  |                        |                                                                            |       |
| 6  | implementation         | enrol participants, and who will assign participants to                    |       |
| 7  |                        |                                                                            |       |
| 8  |                        | interventions                                                              |       |
| 9  |                        |                                                                            |       |
| 10 |                        |                                                                            |       |
| 11 | Blinding (masking)     | <a href="#">#17a</a> Who will be blinded after assignment to interventions | 8     |
| 12 |                        |                                                                            |       |
| 13 |                        | (eg, trial participants, care providers, outcome                           |       |
| 14 |                        |                                                                            |       |
| 15 |                        | assessors, data analysts), and how                                         |       |
| 16 |                        |                                                                            |       |
| 17 |                        |                                                                            |       |
| 18 |                        |                                                                            |       |
| 19 | Blinding (masking):    | <a href="#">#17b</a> If blinded, circumstances under which unblinding is   | n/a   |
| 20 |                        |                                                                            |       |
| 21 | emergency              | permissible, and procedure for revealing a                                 |       |
| 22 |                        |                                                                            |       |
| 23 | unblinding             | participant's allocated intervention during the trial                      |       |
| 24 |                        |                                                                            |       |
| 25 |                        |                                                                            |       |
| 26 | <b>Methods: Data</b>   |                                                                            |       |
| 27 |                        |                                                                            |       |
| 28 | <b>collection,</b>     |                                                                            |       |
| 29 |                        |                                                                            |       |
| 30 | <b>management, and</b> |                                                                            |       |
| 31 |                        |                                                                            |       |
| 32 | <b>analysis</b>        |                                                                            |       |
| 33 |                        |                                                                            |       |
| 34 |                        |                                                                            |       |
| 35 |                        |                                                                            |       |
| 36 | Data collection plan   | <a href="#">#18a</a> Plans for assessment and collection of outcome,       | 13-14 |
| 37 |                        |                                                                            |       |
| 38 |                        | baseline, and other trial data, including any related                      |       |
| 39 |                        |                                                                            |       |
| 40 |                        | processes to promote data quality (eg, duplicate                           |       |
| 41 |                        |                                                                            |       |
| 42 |                        | measurements, training of assessors) and a                                 |       |
| 43 |                        |                                                                            |       |
| 44 |                        | description of study instruments (eg, questionnaires,                      |       |
| 45 |                        |                                                                            |       |
| 46 |                        | laboratory tests) along with their reliability and validity,               |       |
| 47 |                        |                                                                            |       |
| 48 |                        | if known. Reference to where data collection forms                         |       |
| 49 |                        |                                                                            |       |
| 50 |                        | can be found, if not in the protocol                                       |       |
| 51 |                        |                                                                            |       |
| 52 |                        |                                                                            |       |
| 53 |                        |                                                                            |       |
| 54 |                        |                                                                            |       |
| 55 | Data collection plan:  | <a href="#">#18b</a> Plans to promote participant retention and complete   | 11    |
| 56 |                        |                                                                            |       |
| 57 | retention              | follow-up, including list of any outcome data to be                        |       |
| 58 |                        |                                                                            |       |
| 59 |                        |                                                                            |       |
| 60 |                        |                                                                            |       |

|    |                            |                                                                             |       |
|----|----------------------------|-----------------------------------------------------------------------------|-------|
| 1  |                            | collected for participants who discontinue or deviate                       |       |
| 2  |                            | from intervention protocols                                                 |       |
| 3  |                            |                                                                             |       |
| 4  |                            |                                                                             |       |
| 5  |                            |                                                                             |       |
| 6  | Data management            | <a href="#">#19</a> Plans for data entry, coding, security, and storage,    | 14-15 |
| 7  |                            | including any related processes to promote data                             |       |
| 8  |                            | quality (eg, double data entry; range checks for data                       |       |
| 9  |                            | values). Reference to where details of data                                 |       |
| 10 |                            | management procedures can be found, if not in the                           |       |
| 11 |                            | protocol                                                                    |       |
| 12 |                            |                                                                             |       |
| 13 |                            |                                                                             |       |
| 14 |                            |                                                                             |       |
| 15 |                            |                                                                             |       |
| 16 |                            |                                                                             |       |
| 17 |                            |                                                                             |       |
| 18 |                            |                                                                             |       |
| 19 |                            |                                                                             |       |
| 20 | Statistics: outcomes       | <a href="#">#20a</a> Statistical methods for analysing primary and          | 15    |
| 21 |                            | secondary outcomes. Reference to where other                                |       |
| 22 |                            | details of the statistical analysis plan can be found, if                   |       |
| 23 |                            | not in the protocol                                                         |       |
| 24 |                            |                                                                             |       |
| 25 |                            |                                                                             |       |
| 26 |                            |                                                                             |       |
| 27 |                            |                                                                             |       |
| 28 |                            |                                                                             |       |
| 29 |                            |                                                                             |       |
| 30 | Statistics: additional     | <a href="#">#20b</a> Methods for any additional analyses (eg, subgroup      | 15    |
| 31 | analyses                   | and adjusted analyses)                                                      |       |
| 32 |                            |                                                                             |       |
| 33 |                            |                                                                             |       |
| 34 |                            |                                                                             |       |
| 35 | Statistics: analysis       | <a href="#">#20c</a> Definition of analysis population relating to protocol | 15    |
| 36 | population and             | non-adherence (eg, as randomised analysis), and any                         |       |
| 37 | missing data               | statistical methods to handle missing data (eg,                             |       |
| 38 |                            | multiple imputation)                                                        |       |
| 39 |                            |                                                                             |       |
| 40 |                            |                                                                             |       |
| 41 |                            |                                                                             |       |
| 42 |                            |                                                                             |       |
| 43 |                            |                                                                             |       |
| 44 |                            |                                                                             |       |
| 45 | <b>Methods: Monitoring</b> |                                                                             |       |
| 46 |                            |                                                                             |       |
| 47 |                            |                                                                             |       |
| 48 | Data monitoring:           | <a href="#">#21a</a> Composition of data monitoring committee (DMC);        | 14-15 |
| 49 | formal committee           | summary of its role and reporting structure; statement                      |       |
| 50 |                            | of whether it is independent from the sponsor and                           |       |
| 51 |                            | competing interests; and reference to where further                         |       |
| 52 |                            | details about its charter can be found, if not in the                       |       |
| 53 |                            |                                                                             |       |
| 54 |                            |                                                                             |       |
| 55 |                            |                                                                             |       |
| 56 |                            |                                                                             |       |
| 57 |                            |                                                                             |       |
| 58 |                            |                                                                             |       |
| 59 |                            |                                                                             |       |
| 60 |                            |                                                                             |       |

|    |                      |                                                                             |       |
|----|----------------------|-----------------------------------------------------------------------------|-------|
| 1  |                      | protocol. Alternatively, an explanation of why a DMC                        |       |
| 2  |                      |                                                                             |       |
| 3  |                      | is not needed                                                               |       |
| 4  |                      |                                                                             |       |
| 5  |                      |                                                                             |       |
| 6  | Data monitoring:     | <a href="#">#21b</a> Description of any interim analyses and stopping       | 14-15 |
| 7  |                      |                                                                             |       |
| 8  | interim analysis     | guidelines, including who will have access to these                         |       |
| 9  |                      |                                                                             |       |
| 10 |                      | interim results and make the final decision to                              |       |
| 11 |                      |                                                                             |       |
| 12 |                      | terminate the trial                                                         |       |
| 13 |                      |                                                                             |       |
| 14 |                      |                                                                             |       |
| 15 |                      |                                                                             |       |
| 16 | Harms                | <a href="#">#22</a> Plans for collecting, assessing, reporting, and         | 14-15 |
| 17 |                      |                                                                             |       |
| 18 |                      | managing solicited and spontaneously reported                               |       |
| 19 |                      |                                                                             |       |
| 20 |                      | adverse events and other unintended effects of trial                        |       |
| 21 |                      |                                                                             |       |
| 22 |                      | interventions or trial conduct                                              |       |
| 23 |                      |                                                                             |       |
| 24 |                      |                                                                             |       |
| 25 |                      |                                                                             |       |
| 26 | Auditing             | <a href="#">#23</a> Frequency and procedures for auditing trial conduct, if | n/a   |
| 27 |                      |                                                                             |       |
| 28 |                      | any, and whether the process will be independent                            |       |
| 29 |                      |                                                                             |       |
| 30 |                      | from investigators and the sponsor                                          |       |
| 31 |                      |                                                                             |       |
| 32 |                      |                                                                             |       |
| 33 | <b>Ethics and</b>    |                                                                             |       |
| 34 |                      |                                                                             |       |
| 35 | <b>dissemination</b> |                                                                             |       |
| 36 |                      |                                                                             |       |
| 37 |                      |                                                                             |       |
| 38 |                      |                                                                             |       |
| 39 | Research ethics      | <a href="#">#24</a> Plans for seeking research ethics committee /           | 16    |
| 40 |                      |                                                                             |       |
| 41 | approval             | institutional review board (REC / IRB) approval                             |       |
| 42 |                      |                                                                             |       |
| 43 |                      |                                                                             |       |
| 44 | Protocol             | <a href="#">#25</a> Plans for communicating important protocol              | 15    |
| 45 |                      |                                                                             |       |
| 46 | amendments           | modifications (eg, changes to eligibility criteria,                         |       |
| 47 |                      |                                                                             |       |
| 48 |                      | outcomes, analyses) to relevant parties (eg,                                |       |
| 49 |                      |                                                                             |       |
| 50 |                      | investigators, REC / IRBs, trial participants, trial                        |       |
| 51 |                      |                                                                             |       |
| 52 |                      | registries, journals, regulators)                                           |       |
| 53 |                      |                                                                             |       |
| 54 |                      |                                                                             |       |
| 55 |                      |                                                                             |       |
| 56 | Consent or assent    | <a href="#">#26a</a> Who will obtain informed consent or assent from        | 16    |
| 57 |                      |                                                                             |       |
| 58 |                      |                                                                             |       |
| 59 |                      |                                                                             |       |
| 60 |                      |                                                                             |       |

|    |                       |                                                                                |     |
|----|-----------------------|--------------------------------------------------------------------------------|-----|
| 1  |                       | potential trial participants or authorised surrogates,                         |     |
| 2  |                       |                                                                                |     |
| 3  |                       | and how (see Item 32)                                                          |     |
| 4  |                       |                                                                                |     |
| 5  |                       |                                                                                |     |
| 6  | Consent or assent:    | <a href="#">#26b</a> Additional consent provisions for collection and use of   | n/a |
| 7  |                       |                                                                                |     |
| 8  | ancillary studies     | participant data and biological specimens in ancillary                         |     |
| 9  |                       |                                                                                |     |
| 10 |                       | studies, if applicable                                                         |     |
| 11 |                       |                                                                                |     |
| 12 |                       |                                                                                |     |
| 13 | Confidentiality       | <a href="#">#27</a> How personal information about potential and enrolled      | 16  |
| 14 |                       |                                                                                |     |
| 15 |                       | participants will be collected, shared, and maintained                         |     |
| 16 |                       |                                                                                |     |
| 17 |                       | in order to protect confidentiality before, during, and                        |     |
| 18 |                       |                                                                                |     |
| 19 |                       | after the trial                                                                |     |
| 20 |                       |                                                                                |     |
| 21 |                       |                                                                                |     |
| 22 |                       |                                                                                |     |
| 23 | Declaration of        | <a href="#">#28</a> Financial and other competing interests for principal      | 16  |
| 24 |                       |                                                                                |     |
| 25 | interests             | investigators for the overall trial and each study site                        |     |
| 26 |                       |                                                                                |     |
| 27 |                       |                                                                                |     |
| 28 |                       |                                                                                |     |
| 29 | Data access           | <a href="#">#29</a> Statement of who will have access to the final trial       | 15  |
| 30 |                       |                                                                                |     |
| 31 |                       | dataset, and disclosure of contractual agreements that                         |     |
| 32 |                       |                                                                                |     |
| 33 |                       | limit such access for investigators                                            |     |
| 34 |                       |                                                                                |     |
| 35 |                       |                                                                                |     |
| 36 | Ancillary and post    | <a href="#">#30</a> Provisions, if any, for ancillary and post-trial care, and | n/a |
| 37 |                       |                                                                                |     |
| 38 | trial care            | for compensation to those who suffer harm from trial                           |     |
| 39 |                       |                                                                                |     |
| 40 |                       | participation                                                                  |     |
| 41 |                       |                                                                                |     |
| 42 |                       |                                                                                |     |
| 43 |                       |                                                                                |     |
| 44 | Dissemination         | <a href="#">#31a</a> Plans for investigators and sponsor to communicate        | 8   |
| 45 |                       |                                                                                |     |
| 46 | policy: trial results | trial results to participants, healthcare professionals,                       |     |
| 47 |                       |                                                                                |     |
| 48 |                       | the public, and other relevant groups (eg, via                                 |     |
| 49 |                       |                                                                                |     |
| 50 |                       | publication, reporting in results databases, or other                          |     |
| 51 |                       |                                                                                |     |
| 52 |                       | data sharing arrangements), including any publication                          |     |
| 53 |                       |                                                                                |     |
| 54 |                       | restrictions                                                                   |     |
| 55 |                       |                                                                                |     |
| 56 |                       |                                                                                |     |
| 57 |                       |                                                                                |     |
| 58 |                       |                                                                                |     |
| 59 |                       |                                                                                |     |
| 60 |                       |                                                                                |     |

|    |                      |                      |                                                           |              |
|----|----------------------|----------------------|-----------------------------------------------------------|--------------|
| 1  | Dissemination        | <a href="#">#31b</a> | Authorship eligibility guidelines and any intended use    | 1            |
| 2  |                      |                      |                                                           |              |
| 3  | policy: authorship   |                      | of professional writers                                   |              |
| 4  |                      |                      |                                                           |              |
| 5  |                      |                      |                                                           |              |
| 6  | Dissemination        | <a href="#">#31c</a> | Plans, if any, for granting public access to the full     | n/a          |
| 7  |                      |                      |                                                           |              |
| 8  | policy: reproducible |                      | protocol, participant-level dataset, and statistical code |              |
| 9  |                      |                      |                                                           |              |
| 10 | research             |                      |                                                           |              |
| 11 |                      |                      |                                                           |              |
| 12 |                      |                      |                                                           |              |
| 13 |                      |                      |                                                           |              |
| 14 | <b>Appendices</b>    |                      |                                                           |              |
| 15 |                      |                      |                                                           |              |
| 16 |                      |                      |                                                           |              |
| 17 | Informed consent     | <a href="#">#32</a>  | Model consent form and other related documentation        | Supplemental |
| 18 |                      |                      |                                                           |              |
| 19 | materials            |                      | given to participants and authorised surrogates           | Material     |
| 20 |                      |                      |                                                           |              |
| 21 |                      |                      |                                                           |              |
| 22 |                      |                      |                                                           |              |
| 23 | Biological specimens | <a href="#">#33</a>  | Plans for collection, laboratory evaluation, and storage  | n/a          |
| 24 |                      |                      |                                                           |              |
| 25 |                      |                      | of biological specimens for genetic or molecular          |              |
| 26 |                      |                      |                                                           |              |
| 27 |                      |                      | analysis in the current trial and for future use in       |              |
| 28 |                      |                      |                                                           |              |
| 29 |                      |                      | ancillary studies, if applicable                          |              |
| 30 |                      |                      |                                                           |              |
| 31 |                      |                      |                                                           |              |

32 The SPIRIT Explanation and Elaboration paper is distributed under the terms of the Creative  
 33 Commons Attribution License CC-BY-NC. This checklist was completed on 13. June 2023 using  
 34 <https://www.goodreports.org/>, a tool made by the [EQUATOR Network](#) in collaboration with  
 35 [Penelope.ai](#)
